# Supplementary material
Source: PubMed Central journal article supplement (PMC7284248)
Supplement: mmc1.pdf [file mmc1.pdf]

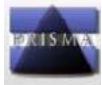

# PRISMA 2009 Checklist

| Section/topic                      | #  | Checklist item                                                                                                                                                                                                                                                                                              | Reported on page #       |
|------------------------------------|----|-------------------------------------------------------------------------------------------------------------------------------------------------------------------------------------------------------------------------------------------------------------------------------------------------------------|--------------------------|
| <b>TITLE</b>                       |    |                                                                                                                                                                                                                                                                                                             |                          |
| Title                              | 1  | Identify the report as a systematic review, meta-analysis, or both.                                                                                                                                                                                                                                         | 1                        |
| <b>ABSTRACT</b>                    |    |                                                                                                                                                                                                                                                                                                             |                          |
| Structured summary                 | 2  | Provide a structured summary including, as applicable: background; objectives; data sources; study eligibility criteria, participants, and interventions; study appraisal and synthesis methods; results; limitations; conclusions and implications of key findings; systematic review registration number. | 3, 4                     |
| <b>INTRODUCTION</b>                |    |                                                                                                                                                                                                                                                                                                             |                          |
| Rationale                          | 3  | Describe the rationale for the review in the context of what is already known.                                                                                                                                                                                                                              | 6                        |
| Objectives                         | 4  | Provide an explicit statement of questions being addressed with reference to participants, interventions, comparisons, outcomes, and study design (PICOS).                                                                                                                                                  | 7                        |
| <b>METHODS</b>                     |    |                                                                                                                                                                                                                                                                                                             |                          |
| Protocol and registration          | 5  | Indicate if a review protocol exists, if and where it can be accessed (e.g., Web address), and, if available, provide registration information including registration number.                                                                                                                               | NA                       |
| Eligibility criteria               | 6  | Specify study characteristics (e.g., PICOS, length of follow-up) and report characteristics (e.g., years considered, language, publication status) used as criteria for eligibility, giving rationale.                                                                                                      | 8                        |
| Information sources                | 7  | Describe all information sources (e.g., databases with dates of coverage, contact with study authors to identify additional studies) in the search and date last searched.                                                                                                                                  | 8,9                      |
| Search                             | 8  | Present full electronic search strategy for at least one database, including any limits used, such that it could be repeated.                                                                                                                                                                               | 8, supplementary table 1 |
| Study selection                    | 9  | State the process for selecting studies (i.e., screening, eligibility, included in systematic review, and, if applicable, included in the meta-analysis).                                                                                                                                                   | 8                        |
| Data collection process            | 10 | Describe method of data extraction from reports (e.g., piloted forms, independently, in duplicate) and any processes for obtaining and confirming data from investigators.                                                                                                                                  | 10                       |
| Data items                         | 11 | List and define all variables for which data were sought (e.g., PICOS, funding sources) and any assumptions and simplifications made.                                                                                                                                                                       | 10                       |
| Risk of bias in individual studies | 12 | Describe methods used for assessing risk of bias of individual studies (including specification of whether this was done at the study or outcome level), and how this information is to be used in any data synthesis.                                                                                      | 10,11                    |
| Summary measures                   | 13 | State the principal summary measures (e.g., risk ratio, difference in means).                                                                                                                                                                                                                               | 12                       |

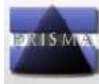

# PRISMA 2009 Checklist

|                      |    |                                                                                                                                                           |    |
|----------------------|----|-----------------------------------------------------------------------------------------------------------------------------------------------------------|----|
| Synthesis of results | 14 | Describe the methods of handling data and combining results of studies, if done, including measures of consistency (e.g., $I^2$ ) for each meta-analysis. | 12 |
|----------------------|----|-----------------------------------------------------------------------------------------------------------------------------------------------------------|----|

Page 1 of 2

| Section/topic                 | #  | Checklist item                                                                                                                                                                                           | Reported on page #                            |
|-------------------------------|----|----------------------------------------------------------------------------------------------------------------------------------------------------------------------------------------------------------|-----------------------------------------------|
| Risk of bias across studies   | 15 | Specify any assessment of risk of bias that may affect the cumulative evidence (e.g., publication bias, selective reporting within studies).                                                             | 11                                            |
| Additional analyses           | 16 | Describe methods of additional analyses (e.g., sensitivity or subgroup analyses, meta-regression), if done, indicating which were pre-specified.                                                         | 11,12                                         |
| <b>RESULTS</b>                |    |                                                                                                                                                                                                          |                                               |
| Study selection               | 17 | Give numbers of studies screened, assessed for eligibility, and included in the review, with reasons for exclusions at each stage, ideally with a flow diagram.                                          | 13                                            |
| Study characteristics         | 18 | For each study, present characteristics for which data were extracted (e.g., study size, PICOS, follow-up period) and provide the citations.                                                             | 13,14,table 1                                 |
| Risk of bias within studies   | 19 | Present data on risk of bias of each study and, if available, any outcome level assessment (see item 12).                                                                                                | 13, 14, supplementary table 2                 |
| Results of individual studies | 20 | For all outcomes considered (benefits or harms), present, for each study: (a) simple summary data for each intervention group (b) effect estimates and confidence intervals, ideally with a forest plot. | 15-18, figures 2-4, supplementary figures 2-4 |
| Synthesis of results          | 21 | Present results of each meta-analysis done, including confidence intervals and measures of consistency.                                                                                                  | 15-18                                         |
| Risk of bias across studies   | 22 | Present results of any assessment of risk of bias across studies (see Item 15).                                                                                                                          | 18,19                                         |
| Additional analysis           | 23 | Give results of additional analyses, if done (e.g., sensitivity or subgroup analyses, meta-regression [see Item 16]).                                                                                    | 15-18                                         |
| <b>DISCUSSION</b>             |    |                                                                                                                                                                                                          |                                               |
| Summary of evidence           | 24 | Summarize the main findings including the strength of evidence for each main outcome; consider their relevance to key groups (e.g., healthcare providers, users, and policy makers).                     | 19                                            |
| Limitations                   | 25 | Discuss limitations at study and outcome level (e.g., risk of bias), and at review-level (e.g., incomplete retrieval of identified research, reporting bias).                                            | 20-23                                         |
| Conclusions                   | 26 | Provide a general interpretation of the results in the context of other evidence, and implications for future research.                                                                                  | 23                                            |
| <b>FUNDING</b>                |    |                                                                                                                                                                                                          |                                               |

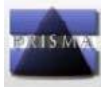

## PRISMA 2009 Checklist

|         |    |                                                                                                                                            |    |
|---------|----|--------------------------------------------------------------------------------------------------------------------------------------------|----|
| Funding | 27 | Describe sources of funding for the systematic review and other support (e.g., supply of data); role of funders for the systematic review. | 24 |
|---------|----|--------------------------------------------------------------------------------------------------------------------------------------------|----|

*From:* Moher D, Liberati A, Tetzlaff J, Altman DG, The PRISMA Group (2009). Preferred Reporting Items for Systematic Reviews and Meta-Analyses: The PRISMA Statement. PLoS Med 6(6): e1000097. doi:10.1371/journal.pmed1000097

For more information, visit: [www.prisma-statement.org](http://www.prisma-statement.org).

## Supplementary Table 1: Detailed search strategy

### OVID

Database(s): **Embase** 1988 to 2020 Week 18, **Ovid MEDLINE(R) 1946 to Present and Epub Ahead of Print, In-Process & Other Non-Indexed Citations and Ovid MEDLINE(R) Daily, EBM Reviews - Cochrane Central Register of Controlled Trials** March 2020, **EBM Reviews - Cochrane Database of Systematic Reviews** 2005 to May 1, 2020

Search Strategy:

| # | Searches                                                                                                                                                                                                                                                                                                                                                                                                                                                                                                                                                                                                                                                                                                                                                                                                                                                                                                                                                                                                                                                                                                                                                                                                                                                                                                                                                                                                     |
|---|--------------------------------------------------------------------------------------------------------------------------------------------------------------------------------------------------------------------------------------------------------------------------------------------------------------------------------------------------------------------------------------------------------------------------------------------------------------------------------------------------------------------------------------------------------------------------------------------------------------------------------------------------------------------------------------------------------------------------------------------------------------------------------------------------------------------------------------------------------------------------------------------------------------------------------------------------------------------------------------------------------------------------------------------------------------------------------------------------------------------------------------------------------------------------------------------------------------------------------------------------------------------------------------------------------------------------------------------------------------------------------------------------------------|
| 1 | (((("Corona virinae" or "corona virus" or Coronavirinae or coronavirus or COVID or nCoV or hCoV) adj4 ("19" or "2019" or novel or new or nouveau or nuevo)) or (pneumon* adj3 Wuhan) or (("Corona virinae" or "corona virus" or Coronavirinae or coronavirus* or COVID or nCoV or hCoV) and (wuhan or china or chinese or hubei)) or "2019-novel Cov" or "2019-ncov" or "COVID-19" or "COVID2019" or "COVID 2019" or "Corona virinae19" or "Corona virinae2019" or "corona virus19" or "coronavirus-19" or "corona virus2019" or Coronavirinae19 or Coronavirinae2019 or coronavirus19 or coronavirus2019 or "coronavirus-2019" or COVID19 or COVID2019 or nCOV19 or ncov-19 or nCOV2019 or "SARS Corona virus 2" or "SARS-coronavirus2" or "SARS-coronavirus-2" or "SARS-COV-2" or "SARS-COV2" or "Severe Acute Respiratory Syndrome Corona virus 2" or "Severe Acute Respiratory Syndrome Coronavirus 2" or sarscov*).ti,ab,hw,kw,mp. or ((coronavir* or COVID*) adj5 (pandemic* or outbreak or shutdown or "shut down*" or "shut-down*" or quarantin* or (lock* adj down) or "lock-down*" or lockdown* or "stay at home" or "stay-at-home" or "shelter-in-place")).ti. or (Severe Acute Respiratory Syndrome Coronavirus 2 or COVID-19 or COVID-19 drug treatment or COVID-19 serotherapy or COVID-19 diagnostic testing or COVID-19 vaccine or spike glycoprotein, COVID-19 virus).os,ps,rs,ox,px,rx,nm. |
| 2 | Nausea/                                                                                                                                                                                                                                                                                                                                                                                                                                                                                                                                                                                                                                                                                                                                                                                                                                                                                                                                                                                                                                                                                                                                                                                                                                                                                                                                                                                                      |
| 3 | vomiting/                                                                                                                                                                                                                                                                                                                                                                                                                                                                                                                                                                                                                                                                                                                                                                                                                                                                                                                                                                                                                                                                                                                                                                                                                                                                                                                                                                                                    |
| 4 | exp "nausea and vomiting"/                                                                                                                                                                                                                                                                                                                                                                                                                                                                                                                                                                                                                                                                                                                                                                                                                                                                                                                                                                                                                                                                                                                                                                                                                                                                                                                                                                                   |
| 5 | exp constipation/                                                                                                                                                                                                                                                                                                                                                                                                                                                                                                                                                                                                                                                                                                                                                                                                                                                                                                                                                                                                                                                                                                                                                                                                                                                                                                                                                                                            |

|    |                                                                                                                                                                                                                                                                                                                                                                                                                                                                                                                                                                                             |
|----|---------------------------------------------------------------------------------------------------------------------------------------------------------------------------------------------------------------------------------------------------------------------------------------------------------------------------------------------------------------------------------------------------------------------------------------------------------------------------------------------------------------------------------------------------------------------------------------------|
| 6  | exp diarrhea/                                                                                                                                                                                                                                                                                                                                                                                                                                                                                                                                                                               |
| 7  | dyspepsia/                                                                                                                                                                                                                                                                                                                                                                                                                                                                                                                                                                                  |
| 8  | flatulence/                                                                                                                                                                                                                                                                                                                                                                                                                                                                                                                                                                                 |
| 9  | exp abdominal pain/                                                                                                                                                                                                                                                                                                                                                                                                                                                                                                                                                                         |
| 10 | (gastrointestinal or gastroenterolog* or gastric or gastritis or intestin* or colon* or cecum or caecum or cecal or gut or ileum or ileal or duoden* or enteric or alimentary or esophag* or oesophag* or stomach or nausea* or vomit* or emesis or "irritable bowel" or crohn* or (abdom* adj2 (disten* or pain* or discomfort or angina)) or feces or fecal* or faecal* or stool* or viscera or visceral or bloat* or flatulen* or flatus or defecat* or "bowel movement*" or constipat* or diarrhea or diarrhoea or indigestion or digestion or digestive or dyspepsia or heartburn).mp. |
| 11 | exp gastrointestinal tract/                                                                                                                                                                                                                                                                                                                                                                                                                                                                                                                                                                 |
| 12 | exp digestive system disease/                                                                                                                                                                                                                                                                                                                                                                                                                                                                                                                                                               |
| 13 | exp liver/                                                                                                                                                                                                                                                                                                                                                                                                                                                                                                                                                                                  |
| 14 | exp biliary tract/                                                                                                                                                                                                                                                                                                                                                                                                                                                                                                                                                                          |
| 15 | exp liver diseases/                                                                                                                                                                                                                                                                                                                                                                                                                                                                                                                                                                         |
| 16 | (liver or hepat* or intrahepat* or bile or biliary).mp.                                                                                                                                                                                                                                                                                                                                                                                                                                                                                                                                     |
| 17 | or/2-16                                                                                                                                                                                                                                                                                                                                                                                                                                                                                                                                                                                     |
| 18 | 1 and 17                                                                                                                                                                                                                                                                                                                                                                                                                                                                                                                                                                                    |
| 19 | 18 not ((exp animals/ or exp nonhuman/) not exp humans/)                                                                                                                                                                                                                                                                                                                                                                                                                                                                                                                                    |
| 20 | limit 19 to yr="2019 -Current"                                                                                                                                                                                                                                                                                                                                                                                                                                                                                                                                                              |
| 21 | remove duplicates from 20                                                                                                                                                                                                                                                                                                                                                                                                                                                                                                                                                                   |

## SCOPUS

|   |                                                                                                                                                                                                                                                                                                                                                                                                                                                                                                                                                                                                                                                                                                                                                                                                                                                                                                                                                                                                                                                                                                                                                                                                               |
|---|---------------------------------------------------------------------------------------------------------------------------------------------------------------------------------------------------------------------------------------------------------------------------------------------------------------------------------------------------------------------------------------------------------------------------------------------------------------------------------------------------------------------------------------------------------------------------------------------------------------------------------------------------------------------------------------------------------------------------------------------------------------------------------------------------------------------------------------------------------------------------------------------------------------------------------------------------------------------------------------------------------------------------------------------------------------------------------------------------------------------------------------------------------------------------------------------------------------|
| 1 | <p>( TITLE-ABS-KEY ( ( ( "Corona virinae" OR "corona virus" OR coronavirinae OR coronavirus OR covid OR ncov OR hcov ) W/4 ( "19" OR "2019" OR novel OR new OR nouveau OR nuevo ) ) OR ( pneumon* W/3 wuhan ) OR ( ( "Corona virinae" OR "corona virus" OR coronavirinae OR coronavirus* OR covid OR ncov OR hcov ) AND ( wuhan OR china OR chinese OR hubei ) ) OR "2019-novel Cov" OR "2019-ncov" OR "COVID-19" OR "COVID2019" OR "COVID 2019" OR "Corona virinae19" OR "Corona virinae2019" OR "corona virus19" OR "coronavirus-19" OR "corona virus2019" OR coronavirinae19 OR coronavirinae2019 OR coronavirus19 OR coronavirus2019 OR "coronavirus-2019" OR covid19 OR covid2019 OR ncov19 OR ncov-19 OR ncov2019 OR "SARS Corona virus 2" OR "SARS-coronavirus2" OR "SARS-coronavirus-2" OR "SARS-COV-2" OR "SARS-COV2" OR "Severe Acute Respiratory Syndrome Corona virus 2" OR "Severe Acute Respiratory Syndrome Coronavirus 2" OR sarscov* ) ) OR ( TITLE ( ( coronavir* OR covid* ) W/5 ( pandemic* OR outbreak OR shutdown OR "shut down*" OR "shut-down*" OR quarantin* OR ( lock* W/ down ) OR "lock-down*" OR lockdown* OR "stay at home" OR "stay-at-home" OR "shelter-in-place" ) ) ) )</p> |
| 2 | <p>TITLE-ABS-KEY ( gastrointestinal OR gastroenterolog* OR gastric OR gastritis OR intestin* OR colon* OR cecum OR caecum OR cecal OR gut OR ileum OR ileal OR duoden* OR enteric OR alimentary OR esophag* OR oesophag* OR stomach OR nausea* OR vomit* OR emesis OR "irritable bowel" OR crohn* OR ( abdom* W/2 ( disten* OR pain* OR discomfort OR angina ) ) OR feces OR fecal* OR faecal* OR stool* OR viscera OR visceral OR bloat* OR flatulen* OR flatus OR defecat* OR "bowel movement*" OR constipat* OR diarrhea OR diarrhoea OR indigestion OR digestion OR digestive OR dyspepsia OR heartburn )</p>                                                                                                                                                                                                                                                                                                                                                                                                                                                                                                                                                                                             |
| 3 | 1 and 2                                                                                                                                                                                                                                                                                                                                                                                                                                                                                                                                                                                                                                                                                                                                                                                                                                                                                                                                                                                                                                                                                                                                                                                                       |
| 4 | INDEX(embase) OR INDEX(medline) OR PMID(0* OR 1* OR 2* OR 3* OR 4* OR 5* OR 6* OR 7* OR 8* OR 9*)                                                                                                                                                                                                                                                                                                                                                                                                                                                                                                                                                                                                                                                                                                                                                                                                                                                                                                                                                                                                                                                                                                             |
| 5 | 3 not 4                                                                                                                                                                                                                                                                                                                                                                                                                                                                                                                                                                                                                                                                                                                                                                                                                                                                                                                                                                                                                                                                                                                                                                                                       |

|    |                                                                                                                                                                                                                                                                                                                                                                                                                                                                                                                                                                                                                                                                                                                                                                                                                                                                                                                                                                                                                                                                                                                                                                                                                                                                                                                                                                                                                                                                                                                                                                                                                                                                                                                                                                                                                                                                                |
|----|--------------------------------------------------------------------------------------------------------------------------------------------------------------------------------------------------------------------------------------------------------------------------------------------------------------------------------------------------------------------------------------------------------------------------------------------------------------------------------------------------------------------------------------------------------------------------------------------------------------------------------------------------------------------------------------------------------------------------------------------------------------------------------------------------------------------------------------------------------------------------------------------------------------------------------------------------------------------------------------------------------------------------------------------------------------------------------------------------------------------------------------------------------------------------------------------------------------------------------------------------------------------------------------------------------------------------------------------------------------------------------------------------------------------------------------------------------------------------------------------------------------------------------------------------------------------------------------------------------------------------------------------------------------------------------------------------------------------------------------------------------------------------------------------------------------------------------------------------------------------------------|
| 6  | DOCTYPE(ed) OR DOCTYPE(bk) OR DOCTYPE(er) OR DOCTYPE(no) OR DOCTYPE(sh) OR DOCTYPE(ch)                                                                                                                                                                                                                                                                                                                                                                                                                                                                                                                                                                                                                                                                                                                                                                                                                                                                                                                                                                                                                                                                                                                                                                                                                                                                                                                                                                                                                                                                                                                                                                                                                                                                                                                                                                                         |
| 7  | 5 not 6                                                                                                                                                                                                                                                                                                                                                                                                                                                                                                                                                                                                                                                                                                                                                                                                                                                                                                                                                                                                                                                                                                                                                                                                                                                                                                                                                                                                                                                                                                                                                                                                                                                                                                                                                                                                                                                                        |
| 8  | PUBYEAR > 2018                                                                                                                                                                                                                                                                                                                                                                                                                                                                                                                                                                                                                                                                                                                                                                                                                                                                                                                                                                                                                                                                                                                                                                                                                                                                                                                                                                                                                                                                                                                                                                                                                                                                                                                                                                                                                                                                 |
| 9  | 7 and 8                                                                                                                                                                                                                                                                                                                                                                                                                                                                                                                                                                                                                                                                                                                                                                                                                                                                                                                                                                                                                                                                                                                                                                                                                                                                                                                                                                                                                                                                                                                                                                                                                                                                                                                                                                                                                                                                        |
| 10 | ( TITLE-ABS-KEY ( ( alpaca OR alpacas OR amphibian OR amphibians OR animal OR animals OR antelope OR armadillo OR armadillos OR avian OR baboon OR baboons OR beagle OR beagles OR bee OR bees OR bird OR birds OR bison OR bovine OR buffalo OR buffaloes OR buffalos OR "c elegans" OR "Caenorhabditis elegans" OR camel OR camels OR canine OR canines OR carp OR cats OR cattle OR chick OR chicken OR chickens OR chicks OR chimp OR chimpanze OR chimpanzees OR chimps OR cow OR cows OR "D melanogaster" OR "dairy calf" OR "dairy calves" OR deer OR dog OR dogs OR donkey OR donkeys OR drosophila OR "Drosophila melanogaster" OR duck OR duckling OR ducklings OR ducks OR equid OR equids OR equine OR equines OR feline OR felines OR ferret OR ferrets OR finch OR finches OR fish OR flatworm OR flatworms OR fox OR foxes OR frog OR frogs OR "fruit flies" OR "fruit fly" OR "G mellonella" OR "Galleria mellonella" OR geese OR gerbil OR gerbils OR goat OR goats OR goose OR gorilla OR gorillas OR hamster OR hamsters OR hare OR hares OR heifer OR heifers OR horse OR horses OR insect OR insects OR jellyfish OR kangaroo OR kangaroos OR kitten OR kittens OR lagomorph OR lagomorphs OR lamb OR lambs OR llama OR llamas OR macaque OR macaques OR macaw OR macaws OR marmoset OR marmosets OR mice OR minipig OR minipigs OR mink OR minks OR monkey OR monkeys OR mouse OR mule OR mules OR nematode OR nematodes OR octopus OR octopuses OR orangutan OR "orang-utan" OR orangutans OR "orang-utans" OR oxen OR parrot OR parrots OR pig OR pigeon OR pigeons OR piglet OR piglets OR pigs OR porcine OR primate OR primates OR quail OR rabbit OR rabbits OR rat OR rats OR reptile OR reptiles OR rodent OR rodents OR ruminant OR ruminants OR salmon OR sheep OR shrimp OR slug OR slugs OR swine OR tamarin OR tamarins OR toad OR toads OR |

|    |                                                                                                                                                                                         |
|----|-----------------------------------------------------------------------------------------------------------------------------------------------------------------------------------------|
|    | trout OR urchin OR urchins OR vole OR voles OR waxworm OR waxworms OR worm OR worms OR xenopus<br>OR "zebra fish" OR zebrafish ) AND NOT ( human OR humans OR patient OR patients ) ) ) |
| 11 | 9 not 10                                                                                                                                                                                |



**Supplementary Table 2: Assessment of risk of bias in included studies**

| Serial no. | Study                                                                | Type of Study | Selection                             | Ascertainment |         | Causality                    |                       |               |                    | Reporting                                           | Total score | Assessment of ROB |
|------------|----------------------------------------------------------------------|---------------|---------------------------------------|---------------|---------|------------------------------|-----------------------|---------------|--------------------|-----------------------------------------------------|-------------|-------------------|
|            |                                                                      |               | Selection represents whole experience | Exposure      | Outcome | Alternative causes ruled out | Challenge-rechallenge | Dose-response | Follow up adequate | Case description adequate for replication/inference |             |                   |
| 1.         | An P et. al. (2020) <sup>1</sup>                                     | Case series   | N                                     | Y             | N       | Y                            | -                     | -             | N                  | Y                                                   | 3/6         | High              |
| 2.         | Chan F-W et. al. (2020) <sup>2</sup>                                 | Case series   | N                                     | Y             | N       | Y                            | -                     | -             | N/A                | Y                                                   | 3/6         | High              |
| 3.         | Chang D et. al. (2020) <sup>3</sup>                                  | Case series   | N                                     | Y             | N       | N                            | -                     | -             | Y                  | N                                                   | 2/6         | High              |
| 4.         | Chen N et. al. (2020) <sup>4</sup>                                   | Case series   | Y                                     | Y             | Y       | Y                            | -                     | -             | Y                  | Y                                                   | 6/6         | Low               |
| 5.         | Chen Q (a) et. al. (2020) <sup>5</sup>                               | Case series   | N                                     | Y             | N       | Y                            | -                     | -             | N                  | N                                                   | 2/6         | High              |
| 6.         | Chen Q (b) et. al. (2020) <sup>6</sup>                               | Case series   | N                                     | Y             | Y       | N                            | -                     | -             | Y                  | Y                                                   | 4/6         | Medium            |
| 7.         | Cheung K et. al. (2020) <sup>7</sup>                                 | Case series   | N                                     | Y             | N       | N                            | -                     | -             | N/A                | Y                                                   | 2/6         | High              |
| 8.         | Cholankeril G et. al. (2020) <sup>8</sup>                            | Case series   | N                                     | Y             | N       | N                            | -                     | -             | N/A                | Y                                                   | 2/6         | High              |
| 9.         | COVID National Emergency Response Center (C-NERC; 2020) <sup>9</sup> | Case series   | Y                                     | Y             | N       | N                            | -                     | -             | N                  | Y                                                   | 3/6         | High              |
| 10.        | COVID-19 National                                                    | Case series   | Y                                     | Y             | N       | N                            | -                     | -             | N/A                | Y                                                   | 3/6         | High              |

| Serial no. | Study                                                          | Type of study        | Selection                             | Ascertainment |         | Causality                    |                       |               |                    | Reporting                                           | Total score | Assessment of ROB |
|------------|----------------------------------------------------------------|----------------------|---------------------------------------|---------------|---------|------------------------------|-----------------------|---------------|--------------------|-----------------------------------------------------|-------------|-------------------|
|            |                                                                |                      | Selection represents whole experience | Exposure      | Outcome | Alternative causes ruled out | Challenge-rechallenge | Dose-response | Follow up adequate | Case description adequate for replication/inference |             |                   |
|            | Incident Room Surveillance Team. (C-NIRST; 2020) <sup>10</sup> | (national data base) |                                       |               |         |                              |                       |               |                    |                                                     |             |                   |
| 11.        | Fan H et. al. (2020) <sup>11</sup>                             | Case series          | Y                                     | Y             | N       | N                            | -                     | -             | N/A                | Y                                                   | 3/6         | High              |
| 12.        | Fernandez-Ruiz et. al. (2020) <sup>12</sup>                    | Case series          | N                                     | Y             | Y       | N                            | -                     | -             | N/A                | Y                                                   | 3/6         | High              |
| 13.        | Gritti G et al (2020) <sup>13</sup>                            | Case series          | N                                     | N             | N       | N                            | -                     | -             | N                  | Y                                                   | 1/6         | High              |
| 14.        | Guan W-j et. al. (2020) <sup>14</sup>                          | Retrospective cohort | Y                                     | Y             | Y       | N                            | -                     | -             | N                  | Y                                                   | 4/6         | Medium            |
| 15.        | Hajifathalian K et. al. (2020) <sup>15</sup>                   | Case series          | N                                     | Y             | Y       | N                            | -                     | -             | Y                  | Y                                                   | 4/6         | Medium            |
| 16.        | Han C et. al. (2020) <sup>16</sup>                             | Retrospective cohort | Y                                     | Y             | Y       | N                            | -                     | -             | Y                  | Y                                                   | 5/6         | Low               |
| 17.        | Hsieh W-H et. al. (2020) <sup>17</sup>                         | Case series          | Y                                     | Y             | N       | Y                            | -                     | -             | Y                  | Y                                                   | 5/6         | Medium            |
| 18.        | Huang C et. al. (2020) <sup>18</sup>                           | Prospective cohort   | N                                     | Y             | Y       | N                            | -                     | -             | N/A                | Y                                                   | 3/6         | High              |
| 19.        | Huang R et. al. (2020) <sup>19</sup>                           | Case series          | N                                     | Y             | N       | N                            | -                     | -             | N/A                | Y                                                   | 2/6         | High              |

| Serial no. | Study                                       | Type of study        | Selection                             | Ascertainment |         | Causality                    |                       |               |                    | Reporting                                           | Total score | Assessment of ROB |
|------------|---------------------------------------------|----------------------|---------------------------------------|---------------|---------|------------------------------|-----------------------|---------------|--------------------|-----------------------------------------------------|-------------|-------------------|
|            |                                             |                      | Selection represents whole experience | Exposure      | Outcome | Alternative causes ruled out | Challenge-rechallenge | Dose-response | Follow up adequate | Case description adequate for replication/inference |             |                   |
| 20.        | Huang WH et. al. (2020) <sup>20</sup>       | Case series          | N                                     | Y             | N       | N                            | -                     | -             | N                  | Y                                                   | 2/6         | High              |
| 21.        | Huang Y et. al. (2020) <sup>21</sup>        | Case series          | N                                     | Y             | Y       | N                            | -                     | -             | N/A                | N                                                   | 2/6         | High              |
| 22.        | Jin X et. al. (2020) <sup>22</sup>          | Case series          | Y                                     | Y             | Y       | N                            | -                     | -             | N/A                | Y                                                   | 4/6         | High              |
| 23.        | Kim ES et. al. (2020) <sup>23</sup>         | Case series          | Y                                     | Y             | Y       | N                            | -                     | -             | Y                  | Y                                                   | 5/6         | Low               |
| 24.        | Klopfenstein T et. al. (2020) <sup>24</sup> | Case series          | N                                     | Y             | N       | N                            | -                     | -             | N/A                | N                                                   | 1/6         | High              |
| 25.        | Kluytmans M et al. (2020) <sup>25</sup>     | Case series          | Y                                     | Y             | N       | N                            | -                     | -             | N                  | Y                                                   | 3/6         | High              |
| 26.        | Kuang Y et. al. (2020) <sup>26</sup>        | Retrospective cohort | Y                                     | Y             | Y       | N                            | -                     | -             | N/A                | Y                                                   | 4/6         | Medium            |
| 27.        | Liu K et. al. (2020) <sup>27</sup>          | Case series          | N                                     | Y             | N       | N                            | -                     | -             | N/A                | Y                                                   | 2/6         | High              |
| 28.        | Kujawski S et al. (2020) <sup>28</sup>      | Case series          | N                                     | Y             | N       | N                            | -                     | -             | N/A                | Y                                                   | 2/6         | High              |
| 29.        | Lechien J et. al. (2020) <sup>29</sup>      | Case series          | N                                     | Y             | Y       | N                            | -                     | -             | N/A                | Y                                                   | 3/6         | High              |
| 30.        | Li K et al (2020) <sup>30</sup>             | Case series          | Y                                     | Y             | N       | N                            | -                     | -             | N/A                | Y                                                   | 3/6         | High              |
| 31.        | Lin L et. al. (2020) <sup>31</sup>          | Case series          | N                                     | Y             | N       | N                            | -                     | -             | N/A                | Y                                                   | 2/6         | High              |

| Serial no. | Study                                | Type of study        | Selection                             | Ascertainment |         | Causality                    |                       |               |                    | Reporting                                           | Total score | Assessment of ROB |
|------------|--------------------------------------|----------------------|---------------------------------------|---------------|---------|------------------------------|-----------------------|---------------|--------------------|-----------------------------------------------------|-------------|-------------------|
|            |                                      |                      | Selection represents whole experience | Exposure      | Outcome | Alternative causes ruled out | Challenge-rechallenge | Dose-response | Follow up adequate | Case description adequate for replication/inference |             |                   |
| 32.        | Liu Y et. al. (2020) <sup>32</sup>   | Case series          | N                                     | Y             | N       | N                            | -                     | -             | N/A                | Y                                                   | 2/6         | High              |
| 33.        | Luo S et. al. (2020) <sup>33</sup>   | Case series          | Y                                     | Y             | N       | N                            | -                     | -             | N/A                | Y                                                   | 3/6         | High              |
| 34.        | Nobel Y et. al. (2020) <sup>34</sup> | Case control         | Y                                     | Y             | Y       | N                            | -                     | -             | N                  | Y                                                   | 4/6         | Medium            |
| 35.        | Pan F et. al. (2020) <sup>35</sup>   | Retrospective cohort | N                                     | Y             | Y       | N                            | -                     | -             | Y                  | Y                                                   | 4/6         | Medium            |
| 36.        | Pan L et. al. (2020) <sup>36</sup>   | Retrospective cohort | N                                     | Y             | Y       | N                            | -                     | -             | Y                  | Y                                                   | 4/6         | Medium            |
| 37.        | Pung R et al (2020) <sup>37</sup>    | Case series          | N                                     | Y             | Y       | N                            | -                     | -             | Y                  | Y                                                   | 4/6         | Medium            |
| 38.        | Redd W et. al. (2020) <sup>38</sup>  | Retrospective cohort | Y                                     | Y             | N       | N                            | -                     | -             | N/A                | Y                                                   | 3/6         | High              |
| 39.        | Ren L et. al. (2020) <sup>39</sup>   | Case series          | N                                     | Y             | N       | N                            | -                     | -             | Y                  | Y                                                   | 3/6         | High              |
| 40.        | Shi H et. al. (2020) <sup>40</sup>   | Retrospective cohort | N                                     | Y             | Y       | N                            | -                     | -             | N/A                | Y                                                   | 3/6         | High              |
| 41.        | Shi S et. al. (2020) <sup>41</sup>   | Retrospective cohort | Y                                     | Y             | Y       | N                            | -                     | -             | N/A                | Y                                                   | 4/6         | Medium            |

| Seri al no. | Study                                   | Type of study         | Selection                              | Ascertainment |         | Causality                    |                       |               |                    | Reporting                                            | Tot al score | Assessment of ROB |
|-------------|-----------------------------------------|-----------------------|----------------------------------------|---------------|---------|------------------------------|-----------------------|---------------|--------------------|------------------------------------------------------|--------------|-------------------|
|             |                                         |                       | Selection represent s whole experience | Exposure      | Outcome | Alternative causes ruled out | Challenge-rechallenge | Dose-response | Follow up adequate | Case description adequate for replication/ inference |              |                   |
| 42.         | Shu L et. al. (2020) <sup>42</sup>      | Retros pective cohort | N                                      | Y             | Y       | N                            | -                     | -             | N/A                | Y                                                    | 3/6          | High              |
| 43.         | Siegel A et. al. (2020) <sup>43</sup>   | Case series           | Y                                      | Y             | Y       | N                            | -                     | -             | N                  | Y                                                    | 4/6          | Medium            |
| 44.         | Song F et. al. (2020) <sup>44</sup>     | Case series           | Y                                      | Y             | N       | N                            | -                     | -             | N                  | Y                                                    | 3/6          | High              |
| 45.         | Spiteri G et. al. (2020) <sup>45</sup>  | Case series           | Y                                      | Y             | N       | N                            | -                     | -             | Y                  | Y                                                    | 4/6          | Medium            |
| 46.         | Tabata S et al (2020) <sup>46</sup>     | Case series           | Y                                      | Y             | Y       | N                            | -                     | -             | N                  | Y                                                    | 4/6          | Medium            |
| 47.         | Wan Y et. al. (2020) <sup>47</sup>      | Case series           | N                                      | Y             | Y       | N                            | -                     | -             | N/A                | Y                                                    | 3/6          | High              |
| 48.         | Wang D et. al. (2020) <sup>48</sup>     | Case series           | Y                                      | Y             | Y       | N                            | -                     | -             | N/A                | Y                                                    | 4/6          | Medium            |
| 49.         | Wang L (a) et. al. (2020) <sup>49</sup> | Case series           | N                                      | Y             | Y       | N                            | -                     | -             | N                  | Y                                                    | 3/6          | High              |
| 50.         | Wang L (b) et. al. (2020) <sup>50</sup> | Case series           | N                                      | N             | Y       | N                            | -                     | -             | N/A                | Y                                                    | 2/6          | High              |
| 51.         | Wang L (c) et. al. (2020) <sup>51</sup> | Case series           | N                                      | Y             | Y       | N                            | -                     | -             | Y                  | Y                                                    | 4/6          | Medium            |
| 52.         | Wang X et. al. (2020) <sup>52</sup>     | Case series           | Y                                      | Y             | Y       | N                            | -                     | -             | Y                  | N                                                    | 4/6          | Medium            |
| 53.         | Wang Z et. al. (2020) <sup>53</sup>     | Case series           | N                                      | Y             | Y       | N                            | -                     | -             | N/A                | N                                                    | 2/6          | High              |

| Serial no. | Study                                | Type of study        | Selection                             | Ascertainment |         | Causality                    |                       |               |                    | Reporting                                           | Total score | Assessment of ROB |
|------------|--------------------------------------|----------------------|---------------------------------------|---------------|---------|------------------------------|-----------------------|---------------|--------------------|-----------------------------------------------------|-------------|-------------------|
|            |                                      |                      | Selection represents whole experience | Exposure      | Outcome | Alternative causes ruled out | Challenge-rechallenge | Dose-response | Follow up adequate | Case description adequate for replication/inference |             |                   |
| 54.        | Wei X-S et al. (2020) <sup>54</sup>  | Case series          | N                                     | Y             | Y       | N                            | -                     | -             | N                  | Y                                                   | 3/6         | High              |
| 55.        | Wolfel R et al. (2020) <sup>55</sup> | Case series          | N                                     | Y             | N       | N                            | -                     | -             | N/A                | Y                                                   | 2/6         | High              |
| 56.        | Wu J (a) et al. (2020) <sup>56</sup> | Retrospective cohort | N                                     | Y             | Y       | N                            | -                     | -             | Y                  | Y                                                   | 4/6         | Medium            |
| 57.        | Wu J (b) et al. (2020) <sup>57</sup> | Case series          | N                                     | Y             | Y       | N                            | -                     | -             | N/A                | Y                                                   | 3/6         | High              |
| 58.        | Wu Y et al. (2020) <sup>58</sup>     | Case series          | N                                     | Y             | Y       | N                            | -                     | -             | N/A                | N                                                   | 2/6         | High              |
| 59.        | Xia X et al. (2020) <sup>59</sup>    | Case series          | Y                                     | Y             | Y       | N                            | -                     | -             | N/A                | N                                                   | 3/6         | Medium            |
| 60.        | Xiao F et al. (2020) <sup>60</sup>   | Case series          | N                                     | Y             | N       | N                            | -                     | -             | Y                  | N                                                   | 2/6         | High              |
| 61.        | Xie H et al. (2020) <sup>61</sup>    | Case series          | N                                     | Y             | Y       | N                            | -                     | -             | N                  | Y                                                   | 3/6         | High              |
| 62.        | Xiong Y et al. (2020) <sup>62</sup>  | Case series          | N                                     | Y             | Y       | N                            | -                     | -             | Y                  | Y                                                   | 4/6         | Medium            |
| 63.        | Xu X et al. (2020) <sup>63</sup>     | Case series          | N                                     | Y             | N       | N                            | -                     | -             | N/A                | Y                                                   | 2/6         | High              |
| 64.        | Xu X-W et al. (2020) <sup>64</sup>   | Case series          | N                                     | Y             | Y       | N                            | -                     | -             | Y                  | Y                                                   | 4/6         | Medium            |
| 65.        | Yang F et al. (2020) <sup>65</sup>   | Case series          | Y                                     | Y             | Y       | N                            | -                     | -             | Y                  | Y                                                   | 5/6         | Low               |

| <b>Seri al no.</b> | <b>Study</b>                             | <b>Type of study</b>  | <b>Selection</b>                              | <b>Ascertainment</b> |                | <b>Causality</b>                    |                              |                      |                           | <b>Reporting</b>                                            | <b>Tot al score</b> | <b>Assessment of ROB</b> |
|--------------------|------------------------------------------|-----------------------|-----------------------------------------------|----------------------|----------------|-------------------------------------|------------------------------|----------------------|---------------------------|-------------------------------------------------------------|---------------------|--------------------------|
|                    |                                          |                       | <b>Selection represent s whole experience</b> | <b>Exposure</b>      | <b>Outcome</b> | <b>Alternative causes ruled out</b> | <b>Challenge-rechallenge</b> | <b>Dose-response</b> | <b>Follow up adequate</b> | <b>Case description adequate for replication/ inference</b> |                     |                          |
| 66.                | Yang X et. al. (2020) <sup>66</sup>      | Case series           | Y                                             | Y                    | Y              | N                                   | -                            | -                    | Y                         | Y                                                           | 5/6                 | Low                      |
| 67.                | Young B et. al. (2020) <sup>67</sup>     | Case series           | Y                                             | Y                    | Y              | N                                   | -                            | -                    | Y                         | Y                                                           | 5/6                 | Low                      |
| 68.                | Yu P et. al. (2020) <sup>68</sup>        | Case series           | N                                             | Y                    | N              | N                                   | -                            | -                    | Y                         | Y                                                           | 3/6                 | High                     |
| 69.                | Zhang G et. al. (2020) <sup>69</sup>     | Case series           | N                                             | Y                    | Y              | N                                   | -                            | -                    | N                         | Y                                                           | 3/6                 | High                     |
| 70.                | Zhang J (a) et. al. (2020) <sup>70</sup> | Case series           | Y                                             | Y                    | Y              | N                                   | -                            | -                    | N/A                       | Y                                                           | 4/6                 | Medium                   |
| 71.                | Zhang J (b) et. al. (2020) <sup>71</sup> | Case series           | N                                             | Y                    | Y              | N                                   | -                            | -                    | N                         | N                                                           | 2/6                 | High                     |
| 72.                | Zhao D et. al. (2020) <sup>72</sup>      | Retros pective cohort | N                                             | Y                    | Y              | Y                                   | -                            | -                    | N/A                       | Y                                                           | 4/6                 | High                     |
| 73.                | Zhao W et. al. (2020) <sup>73</sup>      | Case series           | N                                             | Y                    | Y              | N                                   | -                            | -                    | N/A                       | N                                                           | 2/6                 | High                     |
| 74.                | Zhao X-Y et. al. (2020) <sup>74</sup>    | Case series           | N                                             | Y                    | Y              | N                                   | -                            | -                    | N                         | Y                                                           | 3/6                 | High                     |
| 75.                | Zhou F et. al. (2020) <sup>75</sup>      | Retros pective cohort | Y                                             | Y                    | Y              | N                                   | -                            | -                    | N/A                       | Y                                                           | 4/6                 | Mediu m                  |
| 76.                | Zhou S et. al. (2020) <sup>76</sup>      | Case series           | N                                             | Y                    | Y              | N                                   | -                            | -                    | Y                         | Y                                                           | 4/6                 | Medium                   |
| 77.                | Zhou Z et. al. (2020) <sup>77</sup>      | Case Series           | Y                                             | Y                    | Y              | N                                   | -                            | -                    | N/A                       | Y                                                           | 4/6                 | Medium                   |
| 78.                | Zou L et. al. (2020) <sup>78</sup>       | Case series           | N                                             | Y                    | N              | N                                   | -                            | -                    | N/A                       | N                                                           | 1/6                 | High                     |

**Supplementary Table 3: Gastrointestinal symptoms and mortality in COVID-19 patients**

| Serial no. | Study                                                                            | Diarrhea | Vomiting                | Nausea | Loss of appetite | Abdominal pain | Symptom onset         | Mortality in patients with GI symptoms | Overall Mortality |
|------------|----------------------------------------------------------------------------------|----------|-------------------------|--------|------------------|----------------|-----------------------|----------------------------------------|-------------------|
| 1.         | An P et. al. (2020) <sup>1</sup>                                                 | 1        | 1                       | 1      | 6                | ()             | ()                    | ()                                     | ()                |
| 2.         | Chan F-W et. al. (2020) <sup>2</sup>                                             | 2        | ()                      | ()     | ()               | ()             | ()                    | ()                                     | ()                |
| 3.         | Chang D et. al. (2020) <sup>3</sup>                                              | 1        | ()                      | ()     | ()               | ()             | ()                    | ()                                     | ()                |
| 4.         | Chen N et. al. (2020) <sup>4</sup>                                               | 2        | 1                       | 1      | ()               | ()             | ()                    | ()                                     | ()                |
| 5.         | Chen Q (a) et. al. (2020) <sup>5</sup>                                           | 2        | ()                      | ()     | ()               | ()             | ()                    | ()                                     | ()                |
| 6.         | Chen Q (b) et. al. (2020) <sup>6</sup>                                           | 39       | 6                       | 24     | ()               | ()             | At hospital admission | ()                                     | ()                |
| 7.         | Cheung K et. al. (2020) <sup>7</sup>                                             | 13       | 1                       | ()     | ()               | 7              | ()                    | ()                                     | ()                |
| 8.         | Cholankeril G et. al. (2020) <sup>8</sup>                                        | 12       | 12                      | 12     | 22               | 10             | At onset of illness   | 0                                      | 0                 |
| 9.         | COVID National Emergency Response Center (C-NERC; 2020) <sup>9</sup>             | 2        | ()                      | ()     | ()               | 1              | ()                    | ()                                     | ()                |
| 10.        | COVID-19 National Incident Room Surveillance Team. (C-NIRST; 2020) <sup>10</sup> | 48       | 34 (nausea or vomiting) |        | ()               | ()             | ()                    | ()                                     | 3                 |



| Serial no. | Study                                        | Diarrhea | Vomiting               | Nausea | Loss of appetite | Abdominal pain | Symptom onset                                    | Mortality in patients with GI symptoms | Overall Mortality |
|------------|----------------------------------------------|----------|------------------------|--------|------------------|----------------|--------------------------------------------------|----------------------------------------|-------------------|
| 11.        | Fan H et. al. (2020) <sup>11</sup>           | 2        | 7 (nausea or vomiting) |        | ( )              | ( )            | At hospital admission                            | 9                                      | 101               |
| 12.        | Fernandez-Ruiz et. al. (2020) <sup>12</sup>  | 3        | ( )                    | ( )    | ( )              | 1              | At hospital admission                            | ( )                                    | 5                 |
| 13.        | Gritti G et al (2020) <sup>13</sup>          | 5        | ( )                    | ( )    | 2                | ( )            | At hospital admission                            | ( )                                    | 1                 |
| 14.        | Guan W-j et. al. (2020) <sup>14</sup>        | 42       | 55                     | 55     | ( )              | ( )            | ( )                                              | ( )                                    | ( )               |
| 15.        | Hajifathalian K et. al. (2020) <sup>15</sup> | 234      | 91                     | 168    | ( )              | 72             | At admission                                     | ( )                                    | 100               |
| 16.        | Han C et. al. (2020) <sup>16</sup>           | 67       | 24                     | ( )    | 32               | 9              | 13 at onset of illness, 54 at hospital admission | 0                                      | 0                 |
| 17.        | Hsieh W-H et. al. (2020) <sup>17</sup>       | 1        | ( )                    | ( )    | ( )              | 1              | 1 at onset of illness, 1 at hospital admission   | 0                                      | 0                 |
| 18.        | Huang C et. al. (2020) <sup>18</sup>         | 1        | ( )                    | ( )    | ( )              | ( )            | ( )                                              | 0                                      | 6                 |
| 19.        | Huang R et. al. (2020) <sup>19</sup>         | 1        | ( )                    | ( )    | ( )              | ( )            | ( )                                              | ( )                                    | ( )               |
| 20.        | Huang WH et. al. (2020) <sup>20</sup>        | ( )      | ( )                    | ( )    | 2                | ( )            | At hospital admission                            | 0                                      | 0                 |
| 21.        | Huang Y et. al. (2020) <sup>21</sup>         | 5        | ( )                    | ( )    | ( )              | ( )            | At hospital admission                            | ( )                                    | ( )               |
| 22.        | Jin X et. al. (2020) <sup>22</sup>           | 74       | ( )                    | 74     | ( )              | ( )            | At hospital admission                            | 0                                      | 0                 |
| 23.        | Kim ES et. al.                               | 3        | ( )                    | ( )    | ( )              | 1              | ( )                                              | 0                                      | 0                 |

| Serial no. | Study                                       | Diarrhea | Vomiting                | Nausea                   | Loss of appetite | Abdominal pain | Symptom onset                                        | Mortality in patients with GI symptoms | Overall Mortality |
|------------|---------------------------------------------|----------|-------------------------|--------------------------|------------------|----------------|------------------------------------------------------|----------------------------------------|-------------------|
|            | (2020) <sup>23</sup>                        |          |                         |                          |                  |                |                                                      |                                        |                   |
| 24.        | Klopfenstein T et. al. (2020) <sup>24</sup> | 55       | 9                       | 25                       | ( )              | 19             | ( )                                                  | ( )                                    | ( )               |
| 25.        | Kluytmans M Et al. (2020) <sup>25</sup>     | 16       | ( )                     | 15 (nausea and anorexia) |                  | 5              | ( )                                                  | ( )                                    | ( )               |
| 26.        | Kuang Y et. al. (2020) <sup>26</sup>        | 21       | ( )                     | ( )                      | ( )              | ( )            | At hospital admission                                | 0                                      | 0                 |
| 27.        | Liu K et. al. (2020) <sup>27</sup>          | 11       | ( )                     | ( )                      | ( )              | ( )            | ( )                                                  | ( )                                    | ( )               |
| 28.        | Kujawski S et al. (2020) <sup>28</sup>      | 4        | ( )                     | 1                        | ( )              | 2              | ( )                                                  | 0                                      | 0                 |
| 29.        | Lechien J et. al. (2020) <sup>29</sup>      | 208      | 91                      | 91                       | ( )              | 125            | ( )                                                  | ( )                                    | ( )               |
| 30.        | Li K et al (2020) <sup>30</sup>             | 7        | ( )                     | ( )                      | ( )              | ( )            | ( )                                                  | ( )                                    | ( )               |
| 31.        | Lin L et. al. (2020) <sup>31</sup>          | 23       | 4                       | 17                       | 17               | 2              | 11 at onset of illness, 47 during hospital admission | 0                                      | 0                 |
| 32.        | Liu Y et. al. (2020) <sup>32</sup>          | 2        | 2 (nausea and vomiting) |                          | ( )              | ( )            | At hospital admission                                | ( )                                    | 0                 |
| 33.        | Luo S et. al. (2020) <sup>33</sup>          | 68       | 119                     | 134                      | 180              | 45             | At onset of illness                                  | 7                                      | ( )               |
| 34.        | Nobel Y et. al. (2020) <sup>34</sup>        | 58       | ( )                     | 63                       | ( )              | ( )            | ( )                                                  | ( )                                    | 9                 |
| 35.        | Pan F et. al. (2020) <sup>35</sup>          | ( )      | ( )                     | ( )                      | 9                | ( )            | ( )                                                  | 0                                      | 0                 |
| 36.        | Pan L et. al.                               | 35       | 4                       | ( )                      | 81               | 2              | ( )                                                  | ( )                                    | ( )               |



| Serial no. | Study                                   | Diarrhea | Vomiting | Nausea | Loss of appetite | Abdominal pain | Symptom onset         | Mortality in patients with GI symptoms | Overall Mortality |
|------------|-----------------------------------------|----------|----------|--------|------------------|----------------|-----------------------|----------------------------------------|-------------------|
| 51.        | Wang L (c) et. al. (2020) <sup>51</sup> | 43       | ()       | 13     | 94               | ()             | ()                    | ()                                     | 4                 |
| 52.        | Wang X et. al. (2020) <sup>52</sup>     | 152      | 36       | ()     | ()               | 37             | ()                    | ()                                     | 0                 |
| 53.        | Wang Z et. al. (2020) <sup>53</sup>     | 0        | ()       | ()     | ()               | ()             | ()                    | ()                                     | ()                |
| 54.        | Wei X-S et. al. (2020) <sup>54</sup>    | 26       | 6        | 16     | ()               | 2              | At hospital admission | 0                                      | 0                 |
| 55.        | Wolfel R et al. (2020) <sup>55</sup>    | 2        | ()       | ()     | ()               | ()             | At onset of illness   | ()                                     | ()                |
| 56.        | Wu J (a) et. al. (2020) <sup>56</sup>   | 1        | 1        | 1      | ()               | ()             | ()                    | ()                                     | ()                |
| 57.        | Wu J (b) et al (2020) <sup>57</sup>     | 7        | ()       | ()     | ()               | ()             | ()                    | ()                                     | ()                |
| 58.        | Wu Y et. al. (2020) <sup>58</sup>       | 26       | ()       | ()     | ()               | ()             | ()                    | 0                                      | 1                 |
| 59.        | Xia X et. al. (2020) <sup>59</sup>      | 1        | ()       | 1      | ()               | ()             | ()                    | 0                                      | ()                |
| 60.        | Xiao F et. al. (2020) <sup>60</sup>     | 26       | ()       | ()     | ()               | ()             | ()                    | ()                                     | ()                |
| 61.        | Xie H et. al. (2020) <sup>61</sup>      | 7        | ()       | ()     | ()               | ()             | ()                    | ()                                     | ()                |
| 62.        | Xiong Y et. al. (2020) <sup>62</sup>    | 10       | ()       | ()     | ()               | ()             | ()                    | ()                                     | 1                 |
| 63.        | Xu X et al (2020) <sup>63</sup>         | 5        | 2        | 5      | ()               | ()             | At hospital admission | ()                                     | ()                |
| 64.        | Xu X-W et. al. (2020) <sup>64</sup>     | 3        | ()       | ()     | ()               | ()             | At onset of illness   | ()                                     | ()                |
| 65.        | Yang F et. al. (2020) <sup>65</sup>     | 1        | ()       | ()     | ()               | ()             | ()                    | ()                                     | 11                |
| 66.        | Yang X et. al.                          | ()       | 2        | ()     | ()               | ()             | ()                    | ()                                     | ()                |

| Serial no. | Study                                    | Diarrhea                       | Vomiting               | Nausea                 | Loss of appetite | Abdominal pain                 | Symptom onset         | Mortality in patients with GI symptoms | Overall Mortality |
|------------|------------------------------------------|--------------------------------|------------------------|------------------------|------------------|--------------------------------|-----------------------|----------------------------------------|-------------------|
|            | (2020) <sup>66</sup>                     |                                |                        |                        |                  |                                |                       |                                        |                   |
| 67.        | Young B et. al. (2020) <sup>67</sup>     | 3                              | ()                     | ()                     | ()               | ()                             | ()                    | ()                                     | ()                |
| 68.        | Yu P et. al. (2020) <sup>68</sup>        | ()                             | ()                     | ()                     | 1                | ()                             | ()                    | ()                                     | 1                 |
| 69.        | Zhang G et. al. (2020) <sup>69</sup>     | 25                             | ()                     | ()                     | 80               | 5                              | ()                    | ()                                     | 12                |
| 70.        | Zhang J (a) et. al. (2020) <sup>70</sup> | 18                             | 7                      | 24                     | 17               | 8                              | ()                    | ()                                     | ()                |
| 71.        | Zhang J (b) et. al. (2020) <sup>71</sup> | 0                              | 0                      | ()                     | ()               | ()                             | At hospital admission | ()                                     | ()                |
| 72.        | Zhao D et. al. (2020) <sup>72</sup>      | 1                              | ()                     | ()                     | ()               | ()                             | ()                    | 0                                      | 0                 |
| 73.        | Zhao W et. al. (2020) <sup>73</sup>      | 3                              | 2                      | 2(nausea and vomiting) |                  | ()                             | ()                    | ()                                     | ()                |
| 74.        | Zhao X-Y et. al. (2020) <sup>74</sup>    | 13                             | ()                     | 10                     | 10               | 2                              | ()                    | ()                                     | 2                 |
| 75.        | Zhou F et. al. (2020) <sup>75</sup>      | 9                              | 7 (Nausea or vomiting) |                        | ()               | ()                             | At hospital admission | 2                                      | 54                |
| 76.        | Zhou S et. al. (2020) <sup>76</sup>      | 9 (abdominal pain or diarrhea) | ()                     | ()                     | ()               | 9 (abdominal pain or diarrhea) | At hospital admission | ()                                     | ()                |
| 77.        | Zhou Z et. al. (2020) <sup>77</sup>      | 46                             | 15                     | 21                     | ()               | 3                              | ()                    | 5                                      | 16                |
| 78.        | Zou L et. al. (2020) <sup>78</sup>       | 1                              | ()                     | 1                      | 1                | ()                             | ()                    | ()                                     | ()                |

<sup>a</sup>Represented as median (range) or mean (standard deviation), unless otherwise specified. <sup>b</sup> represented as median (interquartile range)

<sup>c</sup>S, severe; NS, non-severe; B, both

( ), missing

**Supplementary Table 4: Assessment of quality of evidence for outcomes**

| <b>Outcome</b>                            | <b>No of studies</b> | <b>Risk of Bias</b> | <b>Inconsistency</b> | <b>Indirectness</b> | <b>Imprecision</b> | <b>Publication bias</b> | <b>Quality per GRADE</b> |
|-------------------------------------------|----------------------|---------------------|----------------------|---------------------|--------------------|-------------------------|--------------------------|
| Prevalence of Diarrhea                    | 74                   | Serious             | Serious              | Not serious         | Not serious        | Serious                 | Low                      |
| Prevalence of Nausea/vomiting             | 42                   | Serious             | Serious              | Not serious         | Not serious        | Serious                 | Low                      |
| Prevalence of Abdominal pain              | 27                   | Serious             | Serious              | Not serious         | Not Serious        | Serious                 | Low                      |
| Prevalence of Loss of appetite            | 20                   | Serious             | Serious              | Not serious         | Not Serious        | Serious                 | Low                      |
| Overall Mortality                         | 42                   | Serious             | Serious              | Serious             | Serious            | Serious                 | Very low                 |
| Mortality among patients with GI symptoms | 21                   | Serious             | Serious              | Serious             | Serious            | serious                 | Very low                 |

GRADE Working Group grades of evidence

High certainty: We are very confident that the true effect lies close to that of the estimate of the effect

Moderate certainty: We are moderately confident in the effect estimate: The true effect is likely to be close to the estimate of the effect, but there is a possibility that it is substantially different

Low certainty: Our confidence in the effect estimate is limited: The true effect may be substantially different from the estimate of the effect

Very low certainty: We have very little confidence in the effect estimate: The true effect is likely to be substantially different from the estimate of effect

## References

1. An PaC, Hongbin and Jiang, Xiaoda and Su, Juan and Xiao, Yong and Ding, Yijuan and Ren, Haixia and Ji, Mengyao and Chen, Yifei and Chen, Wei and Lv, Xiaoguang and Shen, Lei and Chen, Mingkai and Li, Jiao and Yin, Anning and Kang, Jian and Liu, Shuzhong and Tan, Wei and Wu, Lianlian and Dong, Weiguo and Cao, Jiwang and Zhou, Zhongyin and Tan, Shiyun and Chen, Guozhong and Zhou, Jing and Yang, Yanning and yu, Honggang, . Clinical Features of 2019 Novel Coronavirus Pneumonia Presented Gastrointestinal Symptoms But Without Fever Onset. *The Lancet*. 2020;<https://ssrn.com/abstract=3532530> or <http://dx.doi.org/10.2139/ssrn.3532530>
2. Chan JF-W, Yuan S, Kok K-H, et al. A familial cluster of pneumonia associated with the 2019 novel coronavirus indicating person-to-person transmission: a study of a family cluster. *The Lancet*. 2020;395(10223):514-523.
3. Chang D, Lin M, Wei L, et al. Epidemiologic and Clinical Characteristics of Novel Coronavirus Infections Involving 13 Patients Outside Wuhan, China. *JAMA*. 2020;10.1001/jama.2020.1623.
4. Chen N, Zhou M, Dong X, et al. Epidemiological and clinical characteristics of 99 cases of 2019 novel coronavirus pneumonia in Wuhan, China: a descriptive study. *The Lancet*. 2020;395(10223):507-513.
5. Chen Q, Quan B, Li X, et al. A report of clinical diagnosis and treatment of nine cases of coronavirus disease 2019. *Journal of Medical Virology*. 2020;DOI: 10.1002/jmv.25755.
6. Chen Q, Zheng Z, Zhang C, et al. Clinical characteristics of 145 patients with corona virus disease 2019 (COVID-19) in Taizhou, Zhejiang, China. *Infection*. 2020;10.1007/s15010-020-01432-5.
7. Cheung KS, Hung IF, Chan PP, et al. Gastrointestinal Manifestations of SARS-CoV-2 Infection and Virus Load in Fecal Samples from the Hong Kong Cohort and Systematic Review and Meta-analysis. *Gastroenterology*. 2020;10.1053/j.gastro.2020.03.065.

8. Cholankeril G, Podboy A, Aivaliotis VI, et al. High Prevalence of Concurrent Gastrointestinal Manifestations in Patients with SARS-CoV-2: Early Experience from California. *Gastroenterology*. 2020;10.1053/j.gastro.2020.04.008.
9. Covid-19 National Emergency Response Center E CMTK, Prevention. Early Epidemiological and Clinical Characteristics of 28 Cases of Coronavirus Disease in South Korea. . *Osong Public Health Res Perspect* 2020. 2020;11:8-14.
10. Team C-NIRS. COVID-19, Australia: Epidemiology Report 7 (Reporting week ending 19:00 AEDT 14 March 2020). *Commun Dis Intell (2018)*. 2020;44.
11. Fan H, Zhang L, Huang B, et al. Retrospective Analysis of Clinical Features in 101 Death Cases with COVID-19. 2020;<https://doi.org/10.1101/2020.03.09.20033068>.
12. Fernandez-Ruiz M, Andres A, Loinaz C, et al. COVID-19 in solid organ transplant recipients: A single-center case series from Spain. *Am J Transplant*. 2020;10.1111/ajt.15929.
13. Gritti G, Raimondi F, Ripamonti D, et al. Use of siltuximab in patients with COVID-19 pneumonia requiring ventilatory support. *MedRxiv*. 2020;<https://doi.org/10.1101/2020.04.01.20048561>.
14. Guan W-j, Ni Z-y, Hu Y, et al. Clinical characteristics of coronavirus disease 2019 in China. *New England Journal of Medicine*. 2020.
15. Hajifathalian K, Krisko T, Mehta A, et al. Gastrointestinal and Hepatic Manifestations of 2019 Novel Coronavirus Disease in a Large Cohort of Infected Patients From New York: Clinical Implications. *Gastroenterology*. 2020;10.1053/j.gastro.2020.05.010.
16. Han C, Duan C, Zhang S, et al. Digestive Symptoms in COVID-19 Patients With Mild Disease Severity: Clinical Presentation, Stool Viral RNA Testing, and Outcomes. *Am J Gastroenterol*. 2020;10.14309/ajg.0000000000000664.
17. Hsieh W-H, Cheng M-Y, Ho M-W, et al. Featuring COVID-19 cases via screening symptomatic patients with epidemiologic link during flu season in a medical center of central Taiwan. *Journal of Microbiology, Immunology and Infection*. 2020;<https://doi.org/10.1016/j.jmii.2020.03.008>.



18. Huang C, Wang Y, Li X, et al. Clinical features of patients infected with 2019 novel coronavirus in Wuhan, China. *The Lancet*. 2020;395(10223):497-506.
19. Huang R, Xia J, Chen Y, Shan C, Wu C. A family cluster of SARS-CoV-2 infection involving 11 patients in Nanjing, China. *Lancet Infect Dis*. 2020;20(5):534-535.
20. Huang WH, Teng LC, Yeh TK, et al. 2019 novel coronavirus disease (COVID-19) in Taiwan: Reports of two cases from Wuhan, China. *J Microbiol Immunol Infect*. 2020;10.1016/j.jmii.2020.02.009.
21. Huang Y, Tu M, Wang S, et al. Clinical characteristics of laboratory confirmed positive cases of SARS-CoV-2 infection in Wuhan, China: A retrospective single center analysis. *Travel Med Infect Dis*. 2020;10.1016/j.tmaid.2020.101606:101606.
22. Jin X, Lian JS, Hu JH, et al. Epidemiological, clinical and virological characteristics of 74 cases of coronavirus-infected disease 2019 (COVID-19) with gastrointestinal symptoms. *Gut*. 2020;69(6):1002-1009.
23. Kim ES, Chin BS, Kang CK, et al. Clinical Course and Outcomes of Patients with Severe Acute Respiratory Syndrome Coronavirus 2 Infection: a Preliminary Report of the First 28 Patients from the Korean Cohort Study on COVID-19. *J Korean Med Sci*. 2020;35(13):e142.
24. Klopfenstein T, Kadiane-Oussou NJ, Royer PY, Toko L, Gendrin V, Zayet S. Diarrhea: An underestimated symptom in Coronavirus disease 2019. *Clin Res Hepatol Gastroenterol*. 2020;10.1016/j.clinre.2020.04.002.
25. Kluytmans M, Buiting A, Pas S, et al. SARS-CoV-2 infection in 86 healthcare workers in two Dutch hospitals in March 2020. <https://doi.org/10.1101/2020.03.23.20041913>. *medRxiv*. 2020.
26. Kuang Y, Zhang H, Zhou R, et al. Epidemiological and Clinical Characteristics of 944 Cases of 2019 Novel Coronavirus Infection of Non-COVID-19 Exporting City, Zhejiang, China. *Zhejiang, China (February 20, 2020)*. 2020;doi.org/10.2139/ssrn.3543604.
27. Kui L, Fang Y-Y, Deng Y, et al. Clinical characteristics of novel coronavirus cases in tertiary hospitals in Hubei Province. *Chinese medical journal*. 2020;doi: 10.1097/CM9.0000000000000744.

28. Kujawski SA, Wong KK, Collins JP, et al. First 12 patients with coronavirus disease 2019 (COVID-19) in the United States. <https://doi.org/10.1101/2020.03.09.20032896>. *MedRxiv*. 2020.
29. Lechien JR, Chiesa-Estomba CM, De Siati DR, et al. Olfactory and gustatory dysfunctions as a clinical presentation of mild-to-moderate forms of the coronavirus disease (COVID-19): a multicenter European study. *Eur Arch Otorhinolaryngol*. 2020;10.1007/s00405-020-05965-1.
30. Li K, Wu J, Wu F, et al. The Clinical and Chest CT Features Associated With Severe and Critical COVID-19 Pneumonia. *Invest Radiol*. 2020;55(6):327-331.
31. Lin L, Jiang X, Zhang Z, et al. Gastrointestinal symptoms of 95 cases with SARS-CoV-2 infection. *Gut*. 2020;69(6):997-1001.
32. Liu Y, Yang Y, Zhang C, et al. Clinical and biochemical indexes from 2019-nCoV infected patients linked to viral loads and lung injury. *Sci China Life Sci*. 2020;63(3):364-374.
33. Luo S, Zhang X, Xu H. Don't overlook digestive symptoms in patients with 2019 novel coronavirus disease (COVID-19). *Clinical Gastroenterology and Hepatology*. 2020;doi: 10.1016/j.cgh.2020.03.043.
34. Nobel YR, Phipps M, Zucker J, et al. Gastrointestinal Symptoms and COVID-19: Case-Control Study from the United States. *Gastroenterology*. 2020;10.1053/j.gastro.2020.04.017.
35. Pan F, Ye T, Sun P, et al. Time Course of Lung Changes On Chest CT During Recovery From 2019 Novel Coronavirus (COVID-19) Pneumonia. *Radiology*. 2020:200370.
36. Pan L, Mu M, Ren H. Clinical characteristics of COVID-19 patients with digestive symptoms in Hubei, China: a descriptive, cross-sectional, multicenter study. 2020.
37. Pung R, Chiew CJ, Young BE, et al. Investigation of three clusters of COVID-19 in Singapore: implications for surveillance and response measures. *Lancet*. 2020;395(10229):1039-1046.
38. Redd WD, Zhou JC, Hathorn KE, et al. Prevalence and Characteristics of Gastrointestinal Symptoms in Patients with SARS-CoV-2 Infection in the United States: A Multicenter Cohort Study. *Gastroenterology*. 2020;10.1053/j.gastro.2020.04.045.

39. Ren LL, Wang YM, Wu ZQ, et al. Identification of a novel coronavirus causing severe pneumonia in human: a descriptive study. *Chin Med J (Engl)*. 2020;133(9):1015-1024.
40. Shi H, Han X, Jiang N, et al. Radiological findings from 81 patients with COVID-19 pneumonia in Wuhan, China: a descriptive study. *The Lancet Infectious Diseases*. 2020;20(4):425-434.
41. Shi S, Qin M, Shen B, et al. Association of Cardiac Injury With Mortality in Hospitalized Patients With COVID-19 in Wuhan, China. *JAMA Cardiol*. 2020;doi:10.1001/jamacardio.2020.0950.
42. Shu L, Wang X, Li M, et al. Clinical Characteristics of 545 Cases Confirmed COVID-19 in Wuhan Stadium Cabin Hospital. Available at SSRN 3552844. 2020;<https://ssrn.com/abstract=3552844>.
43. Siegel A, Chang PJ, Jarou ZJ, et al. Lung Base Findings of Coronavirus Disease (COVID-19) on Abdominal CT in Patients With Predominant Gastrointestinal Symptoms. *AJR Am J Roentgenol*. 2020;10.2214/AJR.20.23232:1-3.
44. Song F, Shi N, Shan F, et al. Emerging 2019 novel coronavirus (2019-nCoV) pneumonia. *Radiology*. 2020;doi:10.1148/radiol.2020200274:200274.
45. Spiteri G, Fielding J, Diercke M, et al. First cases of coronavirus disease 2019 (COVID-19) in the WHO European Region, 24 January to 21 February 2020. *Euro Surveill*. 2020;25(9).
46. Tabata S, Imai K, Kawano S, et al. The clinical characteristics of COVID-19: a retrospective analysis of 104 patients from the outbreak on board the Diamond Princess cruise ship in Japan <https://doi.org/10.1101/2020.03.18.20038125>. *medRxiv*. 2020.
47. Wan Y, Li J, Shen L, et al. Enteric involvement in hospitalised patients with COVID-19 outside Wuhan. *The lancet Gastroenterology & hepatology*. 2020;10.1016/S2468-1253(20)30118-7.
48. Wang D, Hu B, Hu C, et al. Clinical Characteristics of 138 Hospitalized Patients With 2019 Novel Coronavirus-Infected Pneumonia in Wuhan, China. *JAMA*. 2020;10.1001/jama.2020.1585.
49. Wang L, Gao YH, Lou LL, Zhang GJ. The clinical dynamics of 18 cases of COVID-19 outside of Wuhan, China. *Eur Respir J*. 2020;55(4).

50. Wang L, Duan Y, Zhang W, et al. Epidemiologic and Clinical Characteristics of 26 Cases of COVID-19 Arising from Patient-to-Patient Transmission in Liaocheng, China. *Clin Epidemiol*. 2020;12:387-391.
51. Wang L, He W, Yu X, et al. Coronavirus disease 2019 in elderly patients: Characteristics and prognostic factors based on 4-week follow-up. *J Infect*. 2020;10.1016/j.jinf.2020.03.019.
52. Wang X, Fang J, Zhu Y, et al. Clinical characteristics of non-critically ill patients with novel coronavirus infection (COVID-19) in a Fangcang Hospital. *Clin Microbiol Infect*. 2020;10.1016/j.cmi.2020.03.032.
53. Wang Z, Chen X, Lu Y, Chen F, Zhang W. Clinical characteristics and therapeutic procedure for four cases with 2019 novel coronavirus pneumonia receiving combined Chinese and Western medicine treatment. *Bioscience trends*. 2020;DOI: 10.5582/bst.2020.01030.
54. Wei X-S, Wang X, Niu Y-R, et al. Clinical Characteristics of SARS-CoV-2 Infected Pneumonia with Diarrhea. Available at SSRN 3546120. 2020; <http://dx.doi.org/10.2139/ssrn.3546120>.
55. Wolfel R, Corman VM, Guggemos W, et al. Virological assessment of hospitalized patients with COVID-2019. *Nature*. 2020;10.1038/s41586-020-2196-x.
56. Wu J, Liu J, Zhao X, et al. Clinical characteristics of imported cases of COVID-19 in Jiangsu province: a multicenter descriptive study. *Clinical Infectious Diseases*. 2020.
57. Wu J, Wu X, Zeng W, et al. Chest CT Findings in Patients With Coronavirus Disease 2019 and Its Relationship With Clinical Features. *Invest Radiol*. 2020;55(5):257-261.
58. Wu Y, Guo C, Tang L, et al. Prolonged presence of SARS-CoV-2 viral RNA in faecal samples. *The lancet Gastroenterology & hepatology*. 2020;10.1016/s2468-1253(20)30083-2.
59. Xia XY, Wu J, Liu HL, Xia H, Jia B, Huang WX. Epidemiological and initial clinical characteristics of patients with family aggregation of COVID-19. *J Clin Virol*. 2020;127:104360.

60. Xiao F, Tang M, Zheng X, Liu Y, Li X, Shan H. Evidence for gastrointestinal infection of SARS-CoV-2. *Gastroenterology*. 2020;10.1053/j.gastro.2020.02.055.
61. Xie H, Zhao J, Lian N, Lin S, Xie Q, Zhuo H. Clinical characteristics of non-ICU hospitalized patients with coronavirus disease 2019 and liver injury: A retrospective study. *Liver Int*. 2020;10.1111/liv.14449.
62. Xiong Y, Sun D, Liu Y, et al. Clinical and High-Resolution CT Features of the COVID-19 Infection: Comparison of the Initial and Follow-up Changes. *Invest Radiol*. 2020;55(6):332-339.
63. Xu X, Yu C, Qu J, et al. Imaging and clinical features of patients with 2019 novel coronavirus SARS-CoV-2. *Eur J Nucl Med Mol Imaging*. 2020;47(5):1275-1280.
64. Xu X-W, Wu X-X, Jiang X-G, et al. Clinical findings in a group of patients infected with the 2019 novel coronavirus (SARS-Cov-2) outside of Wuhan, China: retrospective case series. *Bmj*. 2020;368.
65. Yang F, Shi S, Zhu J, Shi J, Dai K, Chen X. Clinical characteristics and outcomes of cancer patients with COVID-19. *J Med Virol*. 2020;10.1002/jmv.25972.
66. Yang X, Yu Y, Xu J, et al. Clinical course and outcomes of critically ill patients with SARS-CoV-2 pneumonia in Wuhan, China: a single-centered, retrospective, observational study. *Lancet Respir Med*. 2020;8(5):475-481.
67. Young BE, Ong SWX, Kalimuddin S, et al. Epidemiologic features and clinical course of patients infected with SARS-CoV-2 in Singapore. *Jama*. 2020.
68. Yu P, Zhu J, Zhang Z, Han Y. A Familial Cluster of Infection Associated With the 2019 Novel Coronavirus Indicating Possible Person-to-Person Transmission During the Incubation Period. *J Infect Dis*. 2020;221(11):1757-1761.
69. Zhang G, Hu C, Luo L, et al. Clinical features and short-term outcomes of 221 patients with COVID-19 in Wuhan, China. *J Clin Virol*. 2020;127:104364.
70. Zhang JJ, Dong X, Cao YY, et al. Clinical characteristics of 140 patients infected with SARS-CoV-2 in Wuhan, China. *Allergy*. 2020;10.1111/all.14238.

71. Zhang J, Wang S, Xue Y. Fecal specimen diagnosis 2019 novel coronavirus-infected pneumonia. *J Med Virol*. 2020;10.1002/jmv.25742.
72. Zhao D, Yao F, Wang L, et al. A comparative study on the clinical features of COVID-19 pneumonia to other pneumonias. *Clinical Infectious Diseases*. 2020;<https://doi.org/10.1093/cid/ciaa247>.
73. Zhao W, Zhong Z, Xie X, Yu Q, Liu J. Relation Between Chest CT Findings and Clinical Conditions of Coronavirus Disease (COVID-19) Pneumonia: A Multicenter Study. *AJR Am J Roentgenol*. 2020;214(5):1072-1077.
74. Zhao XY, Xu XX, Yin HS, et al. Clinical characteristics of patients with 2019 coronavirus disease in a non-Wuhan area of Hubei Province, China: a retrospective study. *BMC Infect Dis*. 2020;20(1):311.
75. Zhou F, Yu T, Du R, et al. Clinical course and risk factors for mortality of adult inpatients with COVID-19 in Wuhan, China: a retrospective cohort study. *The Lancet*. 2020.
76. Zhou S, Wang Y, Zhu T, Xia L. CT Features of Coronavirus Disease 2019 (COVID-19) Pneumonia in 62 Patients in Wuhan, China. *AJR Am J Roentgenol*. 2020;10.2214/AJR.20.22975:1-8.
77. Zhou Z, Zhao N, Shu Y, Han S, Chen B, Shu X. Effect of gastrointestinal symptoms on patients infected with COVID-19. *Gastroenterology*. 2020;<https://doi.org/10.1053/j.gastro.2020.03.020>.
78. Zou L, Ruan F, Huang M, et al. SARS-CoV-2 Viral Load in Upper Respiratory Specimens of Infected Patients. *N Engl J Med*. 2020;382(12):1177-1179.

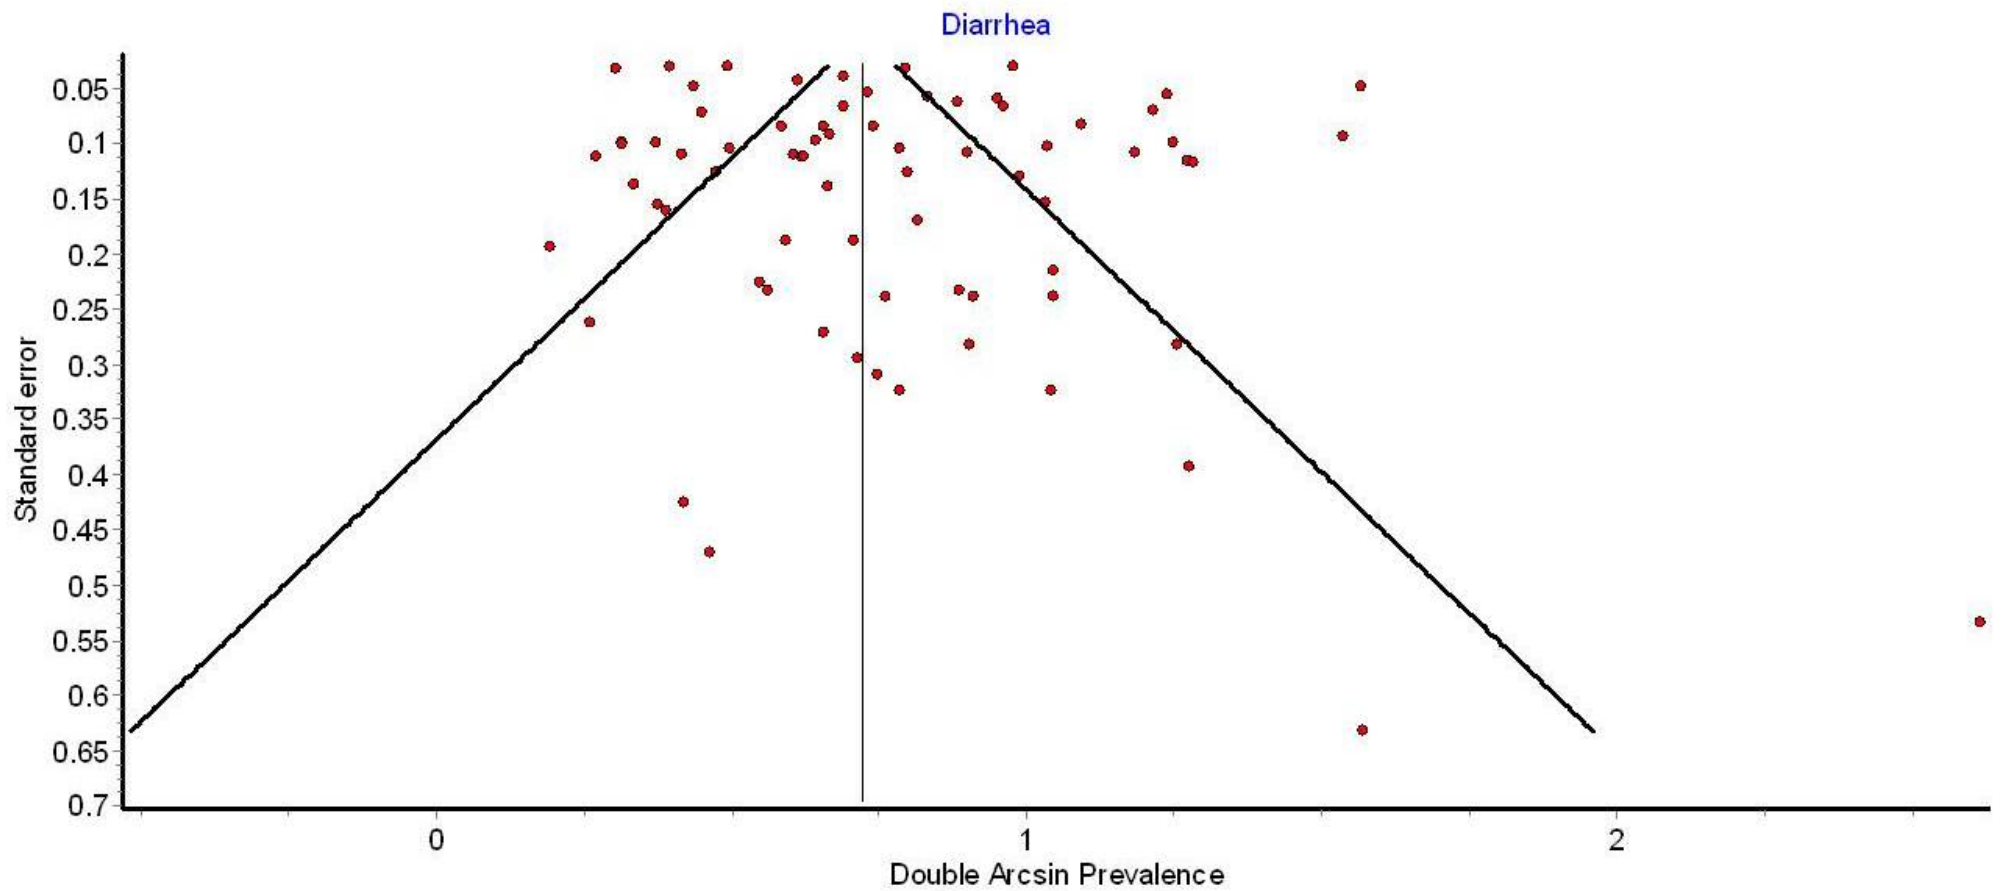

**Supplementary Figure 1:** Funnel plot showing publication bias in included studies describing prevalence of diarrhea in COVID-19 patients



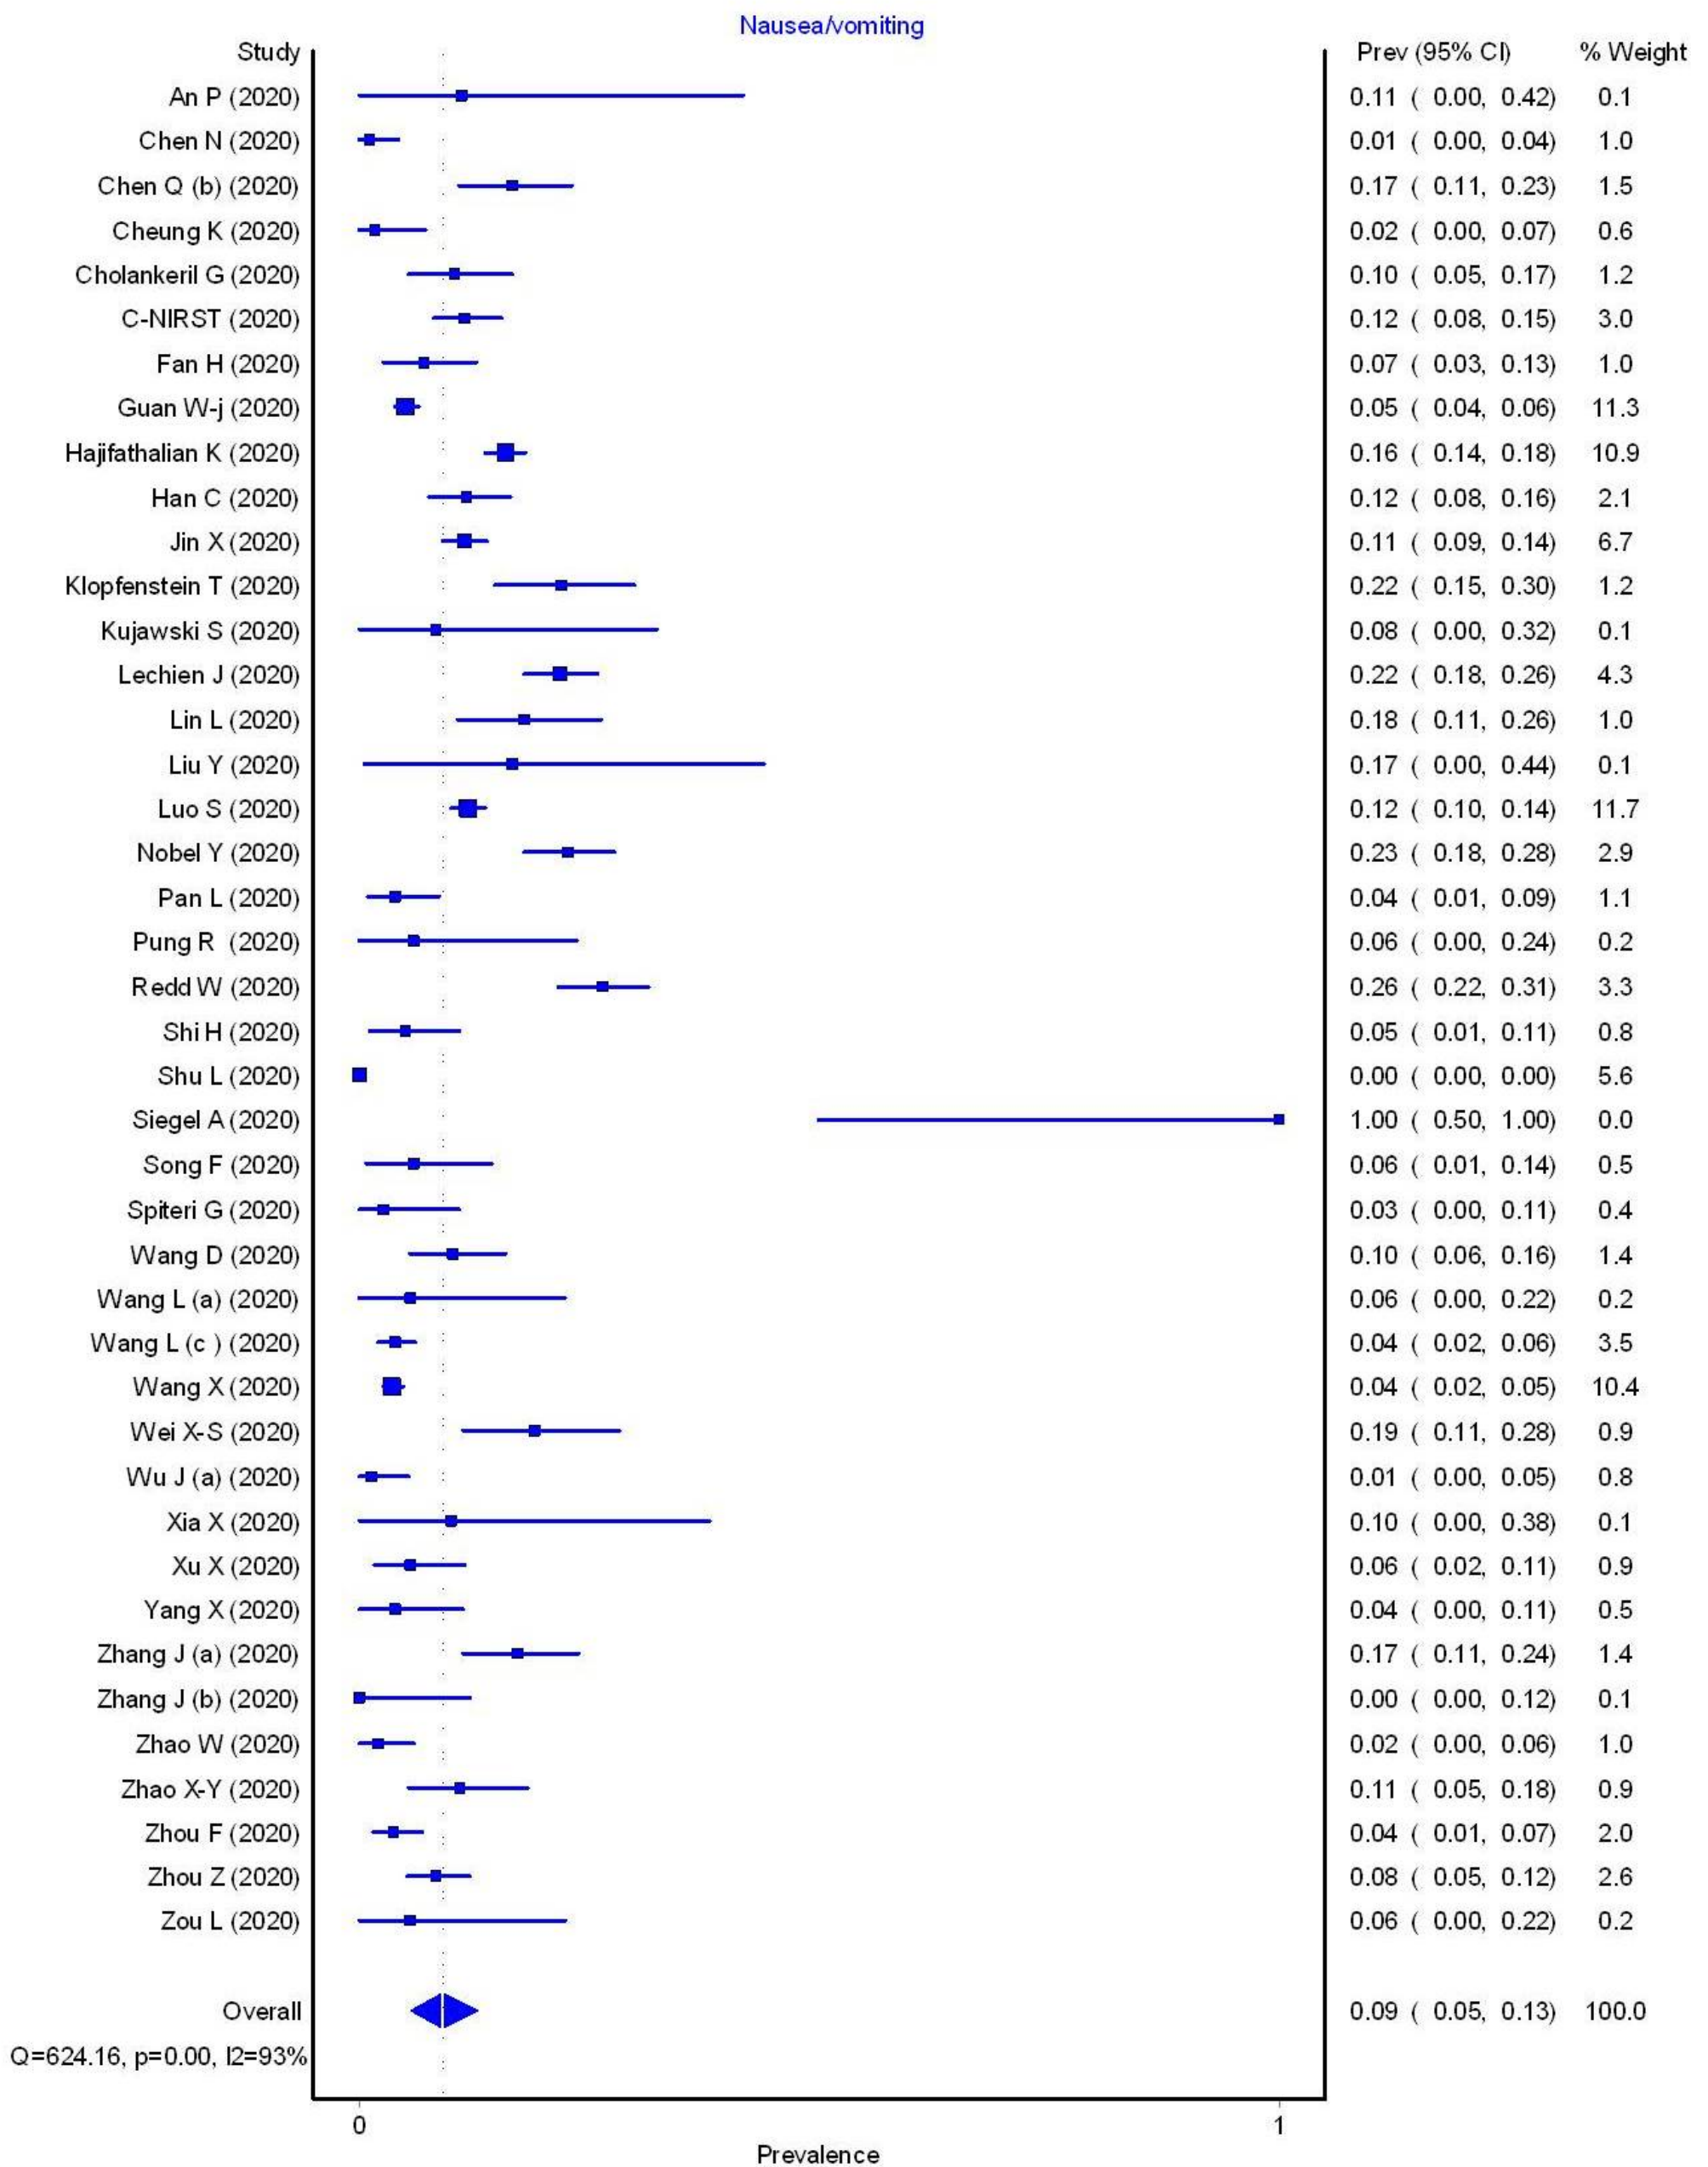

**Supplementary Figure 2:** Forest plot showing weighted pooled prevalence of nausea and/or vomiting in patients with COVID-19 infection



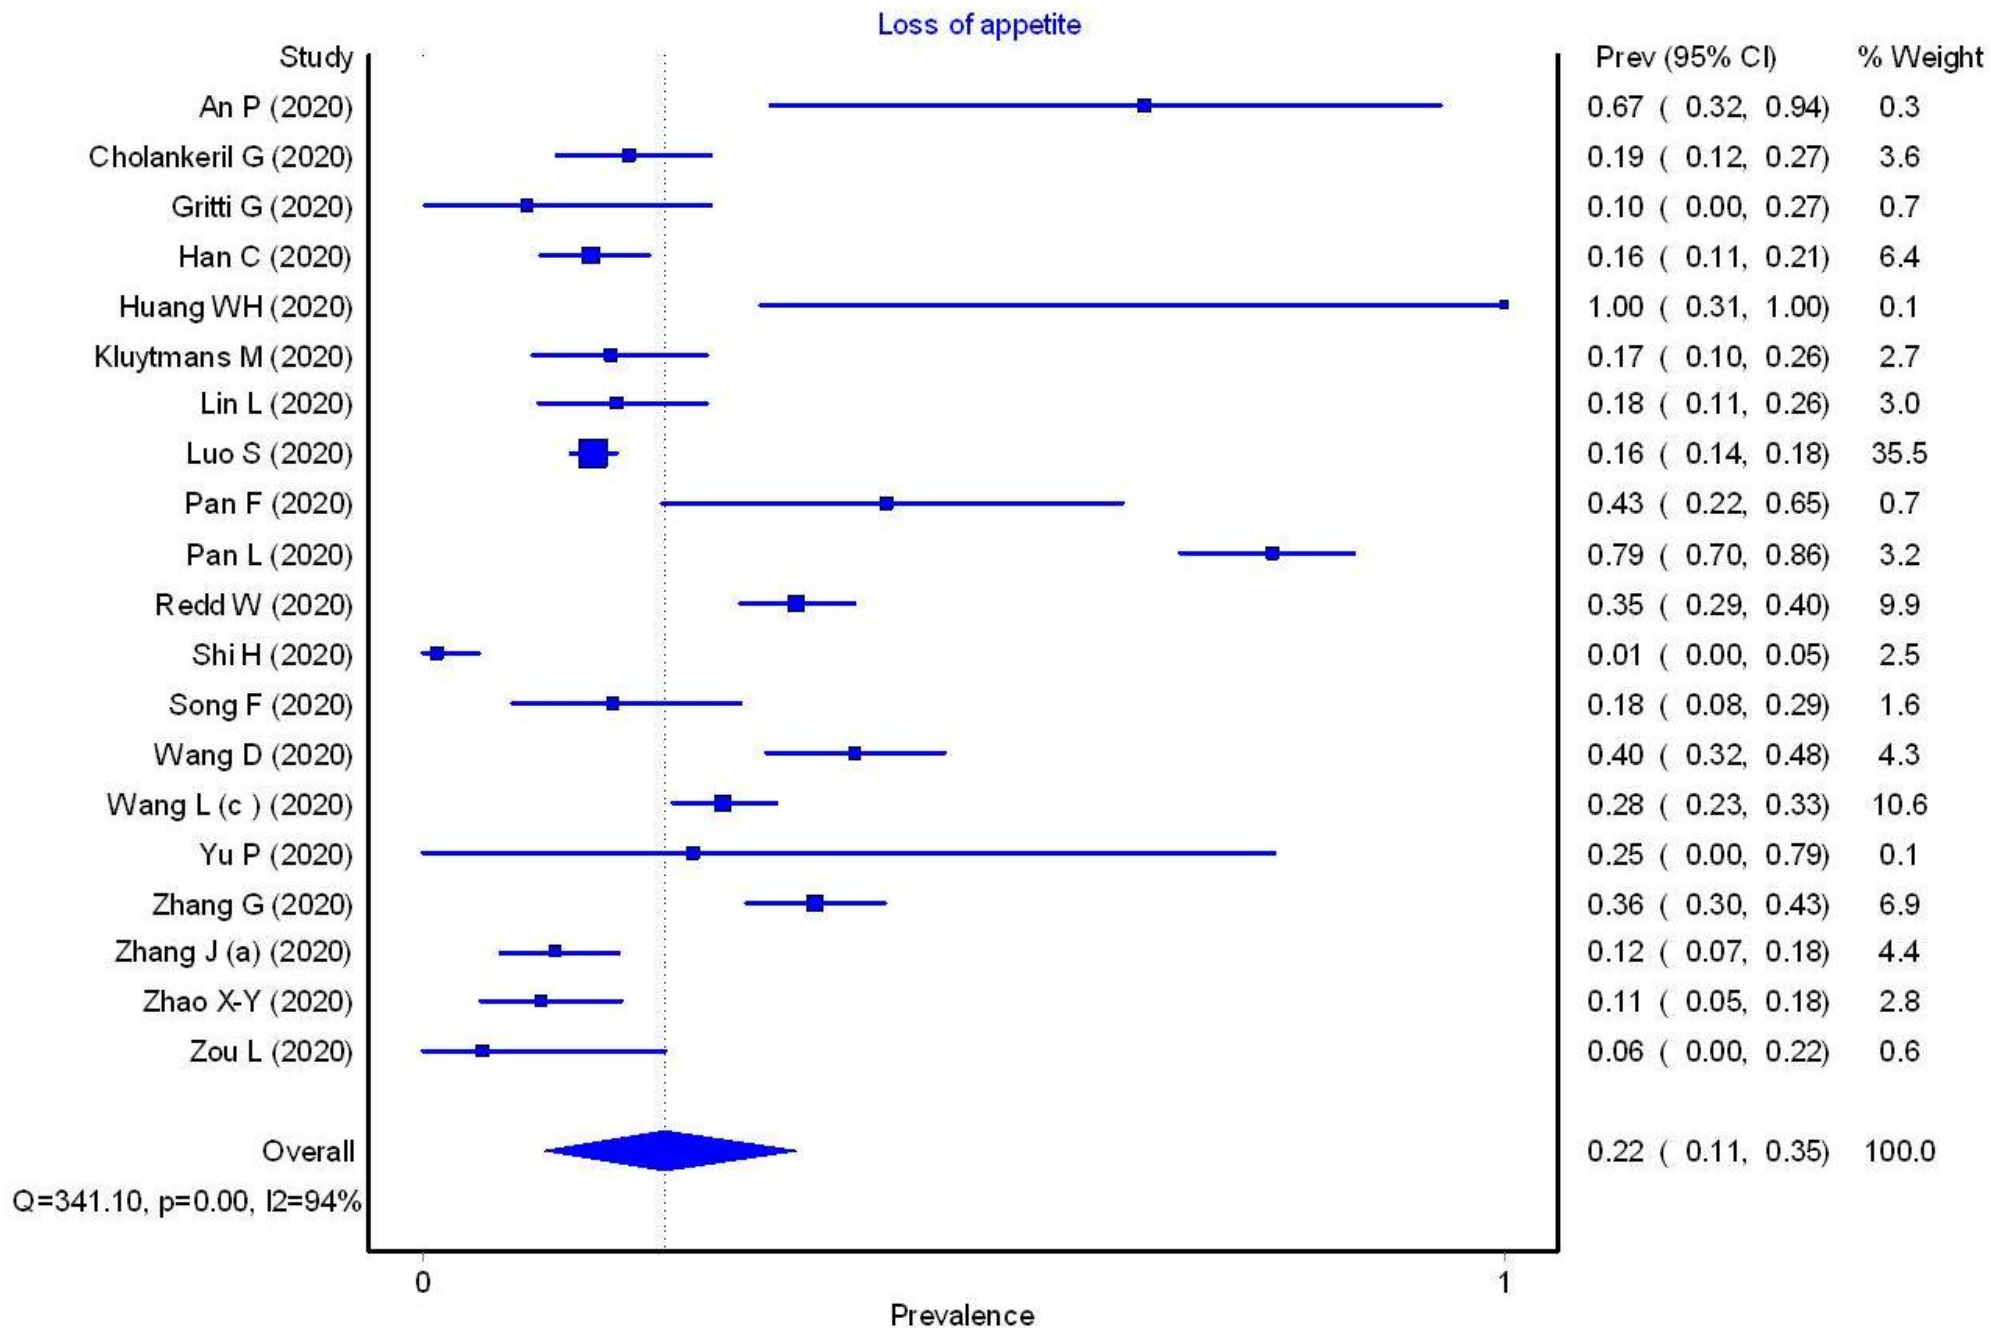

**Supplementary Figure 3:** Forest plot showing weighted pooled prevalence of loss of appetite in patients with COVID-19 infection

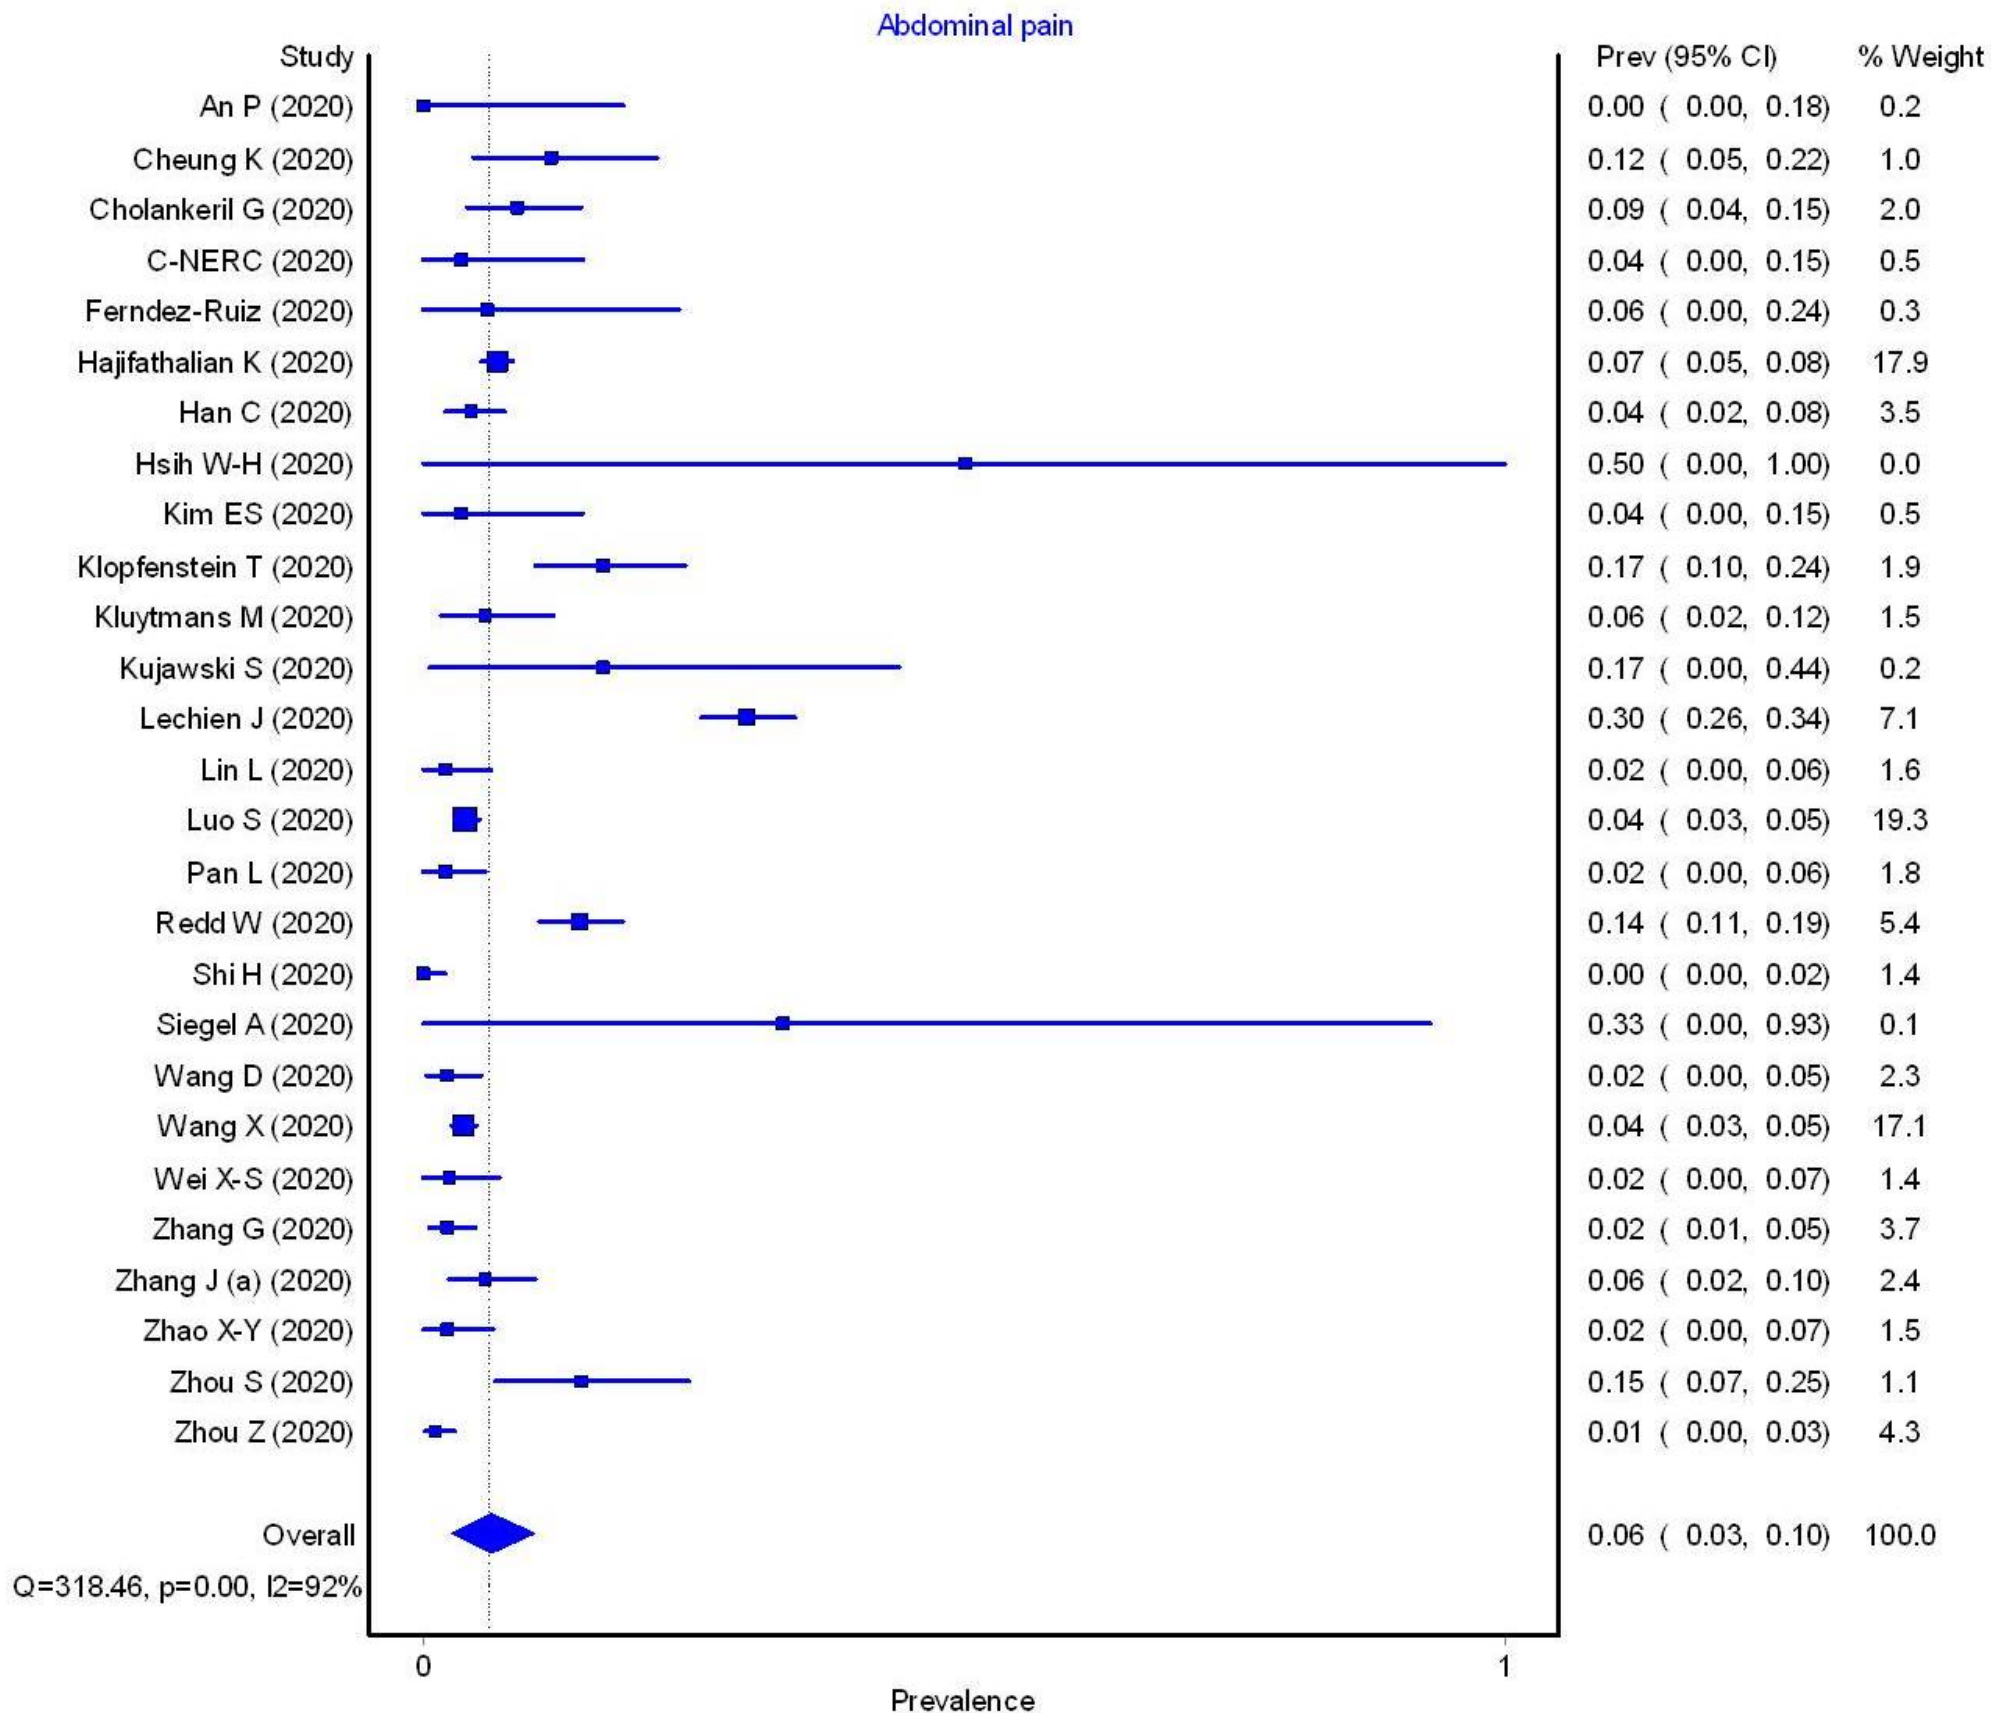

**Supplementary Figure 4:** Forest plot showing weighted pooled prevalence of abdominal pain in patients with COVID-19 infection
